# Supplementary material for: Will future maize improvement programs leverage the canopy light-interception, photosynthetic, and biomass capacities of traditional accessions?
Source: PeerJ. 2023 Apr 27;11:e15233. doi: 10.7717/peerj.15233 (PMC10149054; doi:10.7717/peerj.15233)
Supplement: Supplemental Information 1 [file peerj-11-15233-s001.xlsx]

## Sheet: Sheet1
No	Block	Treatment	Replicate	3_WAP_SPAD	6_WAP_SPAD	10_WAP_SPAD	Average
1	1	4	1	47.9	57.7	50.6	52.0667
2	1	4	2	46.4	53.8	58	52.7333
3	1	4	3	56.8	58.1	48.8	54.5667
4	1	4	4	53	55.7	54.6	54.4333
5	1	4	5	56.7	57	46.1	53.2667
6	1	10	1	67	53.2	41.2	53.8
7	1	10	2	76.3	58.4	58.2	64.3
8	1	10	3	52.2	56.8	54.1	54.3667
9	1	10	4	52.5	58.1	51.3	53.9667
10	1	10	5	46.1	52.3	55.2	51.2
11	1	7	1	45.2	49.3	47.6	47.3667
12	1	7	2	65.2	58.3	57.8	60.4333
13	1	7	3	46.9	57.5	53.7	52.7
14	1	7	4	48.8	54.9	53.4	52.3667
15	1	7	5	40	54.4	47.8	47.4
16	1	8	1	45.5	58.5	47.7	50.5667
17	1	8	2	46.7	58.3	57.1	54.0333
18	1	8	3	45.5	50.4	55.3	50.4
19	1	8	4	50	50.2	53.8	51.3333
20	1	8	5	54.3	56	50.1	53.4667
21	1	9	1	46.2	57.6	51.5	51.7667
22	1	9	2	37.2	53.1	46.9	45.7333
23	1	9	3	50	48.8	57.5	52.1
24	1	9	4	63.4	52.6	53.4	56.4667
25	1	9	5	45.6	53.5	45.4	48.1667
26	1	1	1	57.3	59.1	54.7	57.0333
27	1	1	2	49.6	51.3	46.8	49.2333
28	1	1	3	50.4	54.6	64.6	56.5333
29	1	1	4	40.3	56.8	44.9	47.3333
30	1	1	5	50.9	57.6	54.1	54.2
31	1	3	1	49.9	48.2	38.7	45.6
32	1	3	2	43.4	61.1	53.2	52.5667
33	1	3	3	42.8	53.4	48.1	48.1
34	1	3	4	60.5	59.5	54.7	58.2333
35	1	3	5	47.6	53.6	51.3	50.8333
36	1	6	1	47.3	55.3	57.8	53.4667
37	1	6	2	57.4	49.4	54.3	53.7
38	1	6	3	51.5	56.7	59.9	56.0333
39	1	6	4	52.7	52.4	47.1	50.7333
40	1	6	5	50.3	51.8	60.5	54.2
41	1	2	1	53.1	53.2	49.3	51.8667
42	1	2	2	45.1	52	48.6	48.5667
43	1	2	3	52.5	58.2	53.5	54.7333
44	1	2	4	42.9	57.6	51.3	50.6
45	1	2	5	44.1	57.2	42.8	48.0333
46	1	5	1	40.4	60.6	51.3	50.7667
47	1	5	2	34.6	57.5	55.6	49.2333
48	1	5	3	45.5	63.4	50.6	53.1667
49	1	5	4	49.1	53.1	45.8	49.3333
50	1	5	5	46.1	52.7	48.4	49.0667
51	2	7	1	55.8	55.4	48.3	53.1667
52	2	7	2	40.2	50.7	51.8	47.5667
53	2	7	3	44.7	53.4	53.9	50.6667
54	2	7	4	43.6	50.6	51	48.4
55	2	7	5	50.5	41.9	58.2	50.2
56	2	4	1	47	56.5	45.4	49.6333
57	2	4	2	51.1	58.2	50.2	53.1667
58	2	4	3	48.6	51.3	40.8	46.9
59	2	4	4	35.7	56.3	44.8	45.6
60	2	4	5	55.1	47.4	45	49.1667
61	2	1	1	44.8	62.5	49	52.1
62	2	1	2	46.2	53.2	47.6	49
63	2	1	3	46.5	55.8	47.7	50
64	2	1	4	50	39.7	48.2	45.9667
65	2	1	5	43.8	50.1	50.3	48.0667
66	2	2	1	49.2	40.9	49.2	46.4333
67	2	2	2	61.8	52.6	44.4	52.9333
68	2	2	3	61.9	70.8	42.5	58.4
69	2	2	4	68.2	49.3	46	54.5
70	2	2	5	57	71	43.4	57.1333
71	2	10	1	57	47.7	58.9	54.5333
72	2	10	2	57.3	52.6	57.4	55.7667
73	2	10	3	56.1	61.2	60.3	59.2
74	2	10	4	54.3	66.1	56.6	59
75	2	10	5	53.1	59.7	59.9	57.5667
76	2	5	1	60.5	53.5	64.2	59.4
77	2	5	2	47	49.7	54.2	50.3
78	2	5	3	49.5	44.7	51.9	48.7
79	2	5	4	49.4	47.9	53.1	50.1333
80	2	5	5	59.2	70.1	57.3	62.2
81	2	6	1	42.3	60.4	59.9	54.2
82	2	6	2	71.1	59.1	61.8	64
83	2	6	3	80.8	68.7	58.4	69.3
84	2	6	4	67	47.4	46.3	53.5667
85	2	6	5	46.3	58.2	49	51.1667
86	2	3	1	53.1	53.4	59.5	55.3333
87	2	3	2	45.6	60.6	62.4	56.2
88	2	3	3	49	78.4	55.9	61.1
89	2	3	4	58.3	53.4	64.8	58.8333
90	2	3	5	43.6	45.7	47.8	45.7
91	2	9	1	48.6	58.2	66.6	57.8
92	2	9	2	56.8	44.9	54.6	52.1
93	2	9	3	46.8	57.8	59.1	54.5667
94	2	9	4	58.6	50.6	58.9	56.0333
95	2	9	5	48	48.1	56	50.7
96	2	8	1	56.6	62.9	54.8	58.1
97	2	8	2	54.7	44.7	47.7	49.0333
98	2	8	3	47.2	45.2	57.3	49.9
99	2	8	4	46.2	52.6	50.1	49.6333
100	2	8	5	56.8	59.5	47.3	54.5333
101	3	1	1	49.3	54.7	47	50.3333
102	3	1	2	50.1	55.1	54.7	53.3
103	3	1	3	50.7	56.4	56.3	54.4667
104	3	1	4	49.8	57.1	58	54.9667
105	3	1	5	39.9	45.4	45.4	43.5667
106	3	9	1	43.4	54.5	57.5	51.8
107	3	9	2	44.3	53.6	53.1	50.3333
108	3	9	3	52.7	56.4	59.4	56.1667
109	3	9	4	47	57.3	59	54.4333
110	3	9	5	41.8	58.5	65.2	55.1667
111	3	8	1	48.2	67.4	47.2	54.2667
112	3	8	2	51.5	51.3	39.7	47.5
113	3	8	3	47.4	53.6	49.4	50.1333
114	3	8	4	46.2	54	57.1	52.4333
115	3	8	5	47.6	52.9	47.6	49.3667
116	3	7	1	33.2	46.6	56.9	45.5667
117	3	7	2	45.1	61	51.3	52.4667
118	3	7	3	44.6	52.3	54.9	50.6
119	3	7	4	37.4	49.5	68.6	51.8333
120	3	7	5	43.3	52.9	58.2	51.4667
121	3	3	1	56.8	52.7	62	57.1667
122	3	3	2	55.4	55.4	62.8	57.8667
123	3	3	3	32.1	55.8	58.7	48.8667
124	3	3	4	47.8	54.7	49.9	50.8
125	3	3	5	27.1	51.7	64.6	47.8
126	3	5	1	45.8	58	61	54.9333
127	3	5	2	40.4	53.9	63.4	52.5667
128	3	5	3	49	55.7	66.1	56.9333
129	3	5	4	40.3	49.1	62	50.4667
130	3	5	5	35.8	55.3	59.4	50.1667
131	3	4	1	52.5	55.6	48.6	52.2333
132	3	4	2	52.2	61	50.5	54.5667
133	3	4	3	54.6	59.1	63.5	59.0667
134	3	4	4	59.6	55.7	54.3	56.5333
135	3	4	5	46.6	55.6	56	52.7333
136	3	10	1	58.9	60.1	58.8	59.2667
137	3	10	2	44.6	57	53.3	51.6333
138	3	10	3	47.8	44.3	50.9	47.6667
139	3	10	4	61.7	47	63	57.2333
140	3	10	5	46.7	51.7	62.6	53.6667
141	3	6	1	47.2	59.2	56.1	54.1667
142	3	6	2	45.3	59.7	53.6	52.8667
143	3	6	3	45.8	52.4	58.3	52.1667
144	3	6	4	57.5	52.5	45.9	51.9667
145	3	6	5	52.1	55.4	59.2	55.5667
146	3	2	1	48.1	51.6	59	52.9
147	3	2	2	54.7	55.2	55	54.9667
148	3	2	3	51.9	54.1	50.8	52.2667
149	3	2	4	50.6	52.4	47.1	50.0333
150	3	2	5	51.1	59.6	52.8	54.5
151	4	2	1	52.1	49.8	46.2	49.3667
152	4	2	2	45.5	58.7	50.2	51.4667
153	4	2	3	38.3	55.9	51.7	48.6333
154	4	2	4	43.1	45.7	54.3	47.7
155	4	2	5	46.7	43.1	53.2	47.6667
156	4	3	1	40.2	46.3	48.3	44.9333
157	4	3	2	43.5	49.7	45	46.0667
158	4	3	3	42.1	45.9	51.8	46.6
159	4	3	4	43.1	52.8	56.7	50.8667
160	4	3	5	48	56.4	51.7	52.0333
161	4	9	1	41.2	66.1	52.1	53.1333
162	4	9	2	43.6	55.4	51.8	50.2667
163	4	9	3	43.5	41.7	47	44.0667
164	4	9	4	47.1	54.3	57	52.8
165	4	9	5	49.2	49.4	60.1	52.9
166	4	4	1	45.5	48.8	43.8	46.0333
167	4	4	2	40.7	72	53.2	55.3
168	4	4	3	44	73	51.5	56.1667
169	4	4	4	43	49.4	45.9	46.1
170	4	4	5	52.5	50.6	47.5	50.2
171	4	10	1	47.5	51.2	54.2	50.9667
172	4	10	2	47	76.5	52.5	58.6667
173	4	10	3	52.6	55.3	50.7	52.8667
174	4	10	4	55.6	35.5	51.3	47.4667
175	4	10	5	44.4	42.6	41.6	42.8667
176	4	6	1	47	69	52.3	56.1
177	4	6	2	52.8	56.4	58.4	55.8667
178	4	6	3	50.7	46.9	58.3	51.9667
179	4	6	4	40.9	45.8	51.5	46.0667
180	4	6	5	45.4	57.7	50.7	51.2667
181	4	1	1	55.6	59	53.9	56.1667
182	4	1	2	58.1	72.3	62	64.1333
183	4	1	3	48.1	51.2	43	47.4333
184	4	1	4	46.4	44	59.7	50.0333
185	4	1	5	42.9	59	59.5	53.8
186	4	8	1	40.9	45.2	55.3	47.1333
187	4	8	2	48	52.5	57.2	52.5667
188	4	8	3	59.6	73	52.7	61.7667
189	4	8	4	61	54.1	53.5	56.2
190	4	8	5	49.1	54.6	53.8	52.5
191	4	7	1	52.8	56.2	58.7	55.9
192	4	7	2	60.7	40.2	63	54.6333
193	4	7	3	56	50.3	67.1	57.8
194	4	7	4	52.7	47.3	58.6	52.8667
195	4	7	5	53.8	59.9	55.9	56.5333
196	4	5	1	47.7	51	57.2	51.9667
197	4	5	2	53.7	55.9	55.4	55
198	4	5	3	49.2	49.4	47.9	48.8333
199	4	5	4	47.4	67.7	49.3	54.8
200	4	5	5	45	53.9	48.2	49.0333
