# Supplementary material for: Will future maize improvement programs leverage the canopy light-interception, photosynthetic, and biomass capacities of traditional accessions?
Source: PeerJ. 2023 Apr 27;11:e15233. doi: 10.7717/peerj.15233 (PMC10149054; doi:10.7717/peerj.15233)
Supplement: Supplemental Information 2 [file peerj-11-15233-s002.xlsx]

## Sheet: Sheet1
No	Block	Treatment	Transpration_Rate_molm-2s-1	Photosysnthetic_Rate_µmolm-2S-1	Intercellular_CO2_Concentration_µmolmol-1	Stomatal_Conductance_molm-2S-1	Water Use Efficiency_Instantaneous_μmol[CO2]mmol-1[H2O]	Water Use Efficiency_Intrinsic_μmol[CO2]mol-1[H2O]	100_Grain_Weight	AGDM	Avg_Cob_Weight_per_plant_gr	No_Kernels_per_Cob_Est
74	2	10	0.00144187	12.1605	68.278	0.0712557	8.43385	170.66	17.81	221	102.2	168
33	1	6	0.00266457	18.2121	117.303	0.150664	6.83492	120.879	20.01	229	103.667	190
41	1	5	0.00191533	15.5234	75.7191	0.0997565	8.10481	155.613	20.27	238	108	220
67	2	1	0.00201512	15.5883	90.7423	0.106801	7.73569	145.956	23.29	284	127	280
68	2	2	0.00221966	18.1285	138.976	0.166508	8.16724	108.875	22.05	251	113.2	264
43	1	5	0.00228651	17.3982	104.178	0.131779	7.60909	132.026	22.13	265	115	275
44	1	5	0.00304757	17.501	127.654	0.151583	5.74262	115.455	22.19	270	125.667	276
38	1	2	0.00220461	17.7702	64.5086	0.114046	8.06049	155.816	21.48	238	113	230
8	1	10	0.001906	15.6984	67.6161	0.0980029	8.23631	160.183	23.84	293	130.4	288
73	2	10	0.00154424	12.8025	80.878	0.0796389	8.29053	160.757	23.89	295	131.167	288
64	2	1	0.00275892	18.9396	93.4926	0.142003	6.86485	133.375	24.17	304	132.333	288
40	1	2	0.00253817	19.0011	80.0893	0.133872	7.48614	141.935	24.19	306	134.833	308
71	2	2	0.00236162	19.0718	61.612	0.124152	8.07571	153.617	26.01	322	154	348
70	2	2	0.00227015	19.1063	55.6935	0.12141	8.41634	157.37	24.85	310	136	324
34	1	6	0.00264731	19.387	82.8208	0.139458	7.32328	139.017	24.85	311	136	336
61	2	4	0.00203361	19.3978	59.3274	0.118863	9.5386	163.195	26.61	336	166.333	364
72	2	2	0.00260349	19.4565	89.9498	0.144671	7.47326	134.488	24.95	313	146.167	336
69	2	2	0.00240132	19.6024	59.7846	0.127938	8.1632	153.219	25.16	320	148.167	336
65	2	1	0.00251258	19.712	70.3156	0.13493	7.84535	146.091	25.49	321	149.667	336
39	1	2	0.00243461	21.2224	108.101	0.173036	8.71697	122.647	24.35	307	135	320
5	1	4	0.00262228	20.3043	78.2969	0.134855	7.74298	150.564	26.29	328	154.667	360
58	2	4	0.00219975	20.9617	81.757	0.149549	9.52916	140.166	26.44	329	157.4	360
37	1	2	0.00280611	21.0908	67.0115	0.146781	7.51601	143.689	27.58	356	233	392
28	1	3	0.00226635	21.1632	105.077	0.159209	9.33804	132.927	26.89	341	193.5	368
59	2	4	0.00264695	20.1381	67.4271	0.13755	7.60807	146.406	27.28	349	196.833	372
36	1	2	0.00271311	21.3571	56.8459	0.142783	7.87181	149.577	26.81	338	172.333	364
35	1	6	0.00305629	21.6796	80.2615	0.162443	7.09343	133.459	26.82	340	178.5	364
55	2	7	0.00483111	34.5608	99.5455	0.369942	7.1538	93.4221	26.88	341	181.667	368
3	1	4	0.00366222	30.1979	103.199	0.271607	8.24581	111.183	26.57	335	166	364
53	2	7	0.002181	21.7293	78.5152	0.152132	9.96298	142.832	26.98	344	194.833	372
42	1	5	0.00285018	21.9878	51.2496	0.145583	7.71452	151.032	27.28	345	195	372
32	1	6	0.00329917	22.9291	104.477	0.200005	6.94995	114.643	24.93	312	142.5	336
63	2	1	0.00316319	23.0673	92.7536	0.189341	7.29243	121.83	27.35	352	202	378
29	1	3	0.00287285	23.4227	135.547	0.216994	8.15312	107.942	27.37	355	217.833	380
22	1	1	0.00242894	23.6001	77.8652	0.163955	9.71621	143.943	29.54	389		435
50	1	8	0.0029445	24.8871	97.1026	0.21651	8.45206	114.947	26.49	331	164.833	364
62	2	4	0.00332495	25.6313	92.9285	0.204722	7.70877	125.201	28.62	380		420
76	2	8	0.00294477	25.1567	96.0595	0.219066	8.54284	114.836	27.78	359	238.167	392
31	1	6	0.00348329	25.314	59.4676	0.186859	7.26726	135.471	27.85	360	268.333	392
81	2	8	0.00304591	25.3837	106.615	0.236102	8.33368	107.512	27.88	362	302.833	392
60	2	4	0.00343742	27.677	94.7409	0.239457	8.05168	115.583	27.92	366		396
14	1	7	0.00283138	25.6842	98.9935	0.215645	9.07126	119.104	28.45	368		408
18	1	9	0.00316872	25.8046	117.221	0.241343	8.14354	106.921	29.19	383		432
1	1	4	0.00366378	25.8534	100.814	0.211002	7.05649	122.527	28.28	367		403
45	1	5	0.00371102	26.3856	68.4649	0.208334	7.11007	126.651	27.54	355	221	390
56	2	7	0.00409803	32.4935	102.409	0.36618	7.92907	88.7363	28.56	376		408
13	1	7	0.00305983	26.8926	87.0071	0.218752	8.78894	122.936	27.61	358	233.333	392
78	2	8	0.00360418	27.4918	112.477	0.283012	7.62776	97.1403	28.73	380		420
19	1	9	0.00226635	28.1632	105.077	0.159209	12.4267	176.894	28.07	367		396
6	1	10	0.00455395	29.5512	119.228	0.346311	6.48914	85.3315	28.24	367		403
77	2	8	0.00355131	27.7764	115.075	0.29282	7.82146	94.8584	29.34	386		434
12	1	7	0.00445836	28.0623	139.737	0.328128	6.29431	85.5226	31.35	434		476
85	2	3	0.00285983	25.1557	83.8547	0.189623	8.79622	132.662	29.57	395		440
15	1	7	0.00339078	28.2653	103.384	0.259286	8.33594	109.012	31.21	426		468
86	2	3	0.00287285	28.4227	135.547	0.216994	9.89355	130.984	29.59	399		455
52	1	8	0.00449761	28.8187	139.955	0.382584	6.40757	75.3266	30.85	417		456
66	2	1	0.00461285	28.823	90.1165	0.274184	6.24841	105.123	32.59	490		518
24	1	1	0.00388554	29.1903	118.935	0.282312	7.51254	103.397	31.08	423		459
87	2	3	0.00448618	31.996	118.804	0.332242	7.13214	96.3035	31.16	423		468
30	1	3	0.00379335	29.2277	107.919	0.265089	7.70496	110.256	29.59	396		444
7	1	10	0.00234481	21.702	94.2006	0.163364	9.25535	132.844	31.24	428		468
47	1	8	0.00421346	29.7043	111.059	0.326392	7.04986	91.008	31.24	429		468
82	2	8	0.00351365	29.7047	90.8958	0.284351	8.45406	104.465	28.91	381		430
20	1	9	0.0046023	31.5982	135.913	0.364221	6.86574	86.7555	31.52	449		480
49	1	8	0.00361475	29.8722	79.4107	0.269423	8.26398	110.875	32.51	481		518
84	2	3	0.00366222	30.1979	103.199	0.271607	8.24581	111.183	31.87	460		494
27	1	3	0.0031524	26.8613	93.8464	0.226377	8.52091	118.657	30.85	420		456
57	2	7	0.0039191	31.2107	97.8492	0.311574	7.96374	100.171	32.17	465		496
21	1	1	0.00490494	33.1961	110.452	0.41076	6.76789	80.8164	33.5	504		532
83	2	3	0.0046023	31.5982	135.913	0.364221	6.86574	86.7555	32.4	475		516
26	1	3	0.00379335	29.2277	107.919	0.265089	7.70496	110.256	31.59	452		492
2	1	4	0.00462073	31.8093	88.6614	0.27611	6.88405	115.205	34.94	530		560
79	2	8	0.00418844	31.8314	104.591	0.35734	7.59982	89.0787	33.29	500		518
10	1	10	0.00575292	31.8489	155.185	0.573509	5.53613	55.5334	33.34	502		528
23	1	1	0.00357917	29.7709	82.6523	0.253227	8.31782	117.566	32.27	466		504
4	1	4	0.004332	32.0105	69.5217	0.252129	7.38931	126.961	33.9	510		532
46	1	8	0.0047075	32.2626	127.986	0.441948	6.85345	73.0009	31.93	460		494
51	1	8	0.00272977	21.7142	58.3583	0.136004	7.95458	159.659	34.16	517		546
25	1	1	0.00418474	32.9003	105.359	0.31959	7.86198	102.946	35.56	549		570
54	2	7	0.0055598	33.0795	125.105	0.410471	5.94976	80.5892	36.94	700		624
80	2	8	0.00411249	31.2143	116.77	0.312485	7.59013	99.8904	35.3	530		560
75	2	8	0.0048316	33.1986	116.206	0.42926	6.87114	77.3393	36.67	587		576
9	1	10	0.00556133	33.9334	114.416	0.452938	6.10167	74.9184	39.5	701		630
48	1	8	0.00497209	34.278	116.33	0.462425	6.89407	74.1266	34.9	519		560
16	1	9	0.00474268	34.4436	92.4611	0.350839	7.26248	98.175	36.87	670		608
17	1	9	0.0031624	27.6845	66.5646	0.221601	8.75427	124.929	35.77	573		572
11	1	7	0.0064501	38.0975	120.249	0.543153	5.9065	70.1413	33.92	513		533
