# Supplementary material for: Will future maize improvement programs leverage the canopy light-interception, photosynthetic, and biomass capacities of traditional accessions?
Source: PeerJ. 2023 Apr 27;11:e15233. doi: 10.7717/peerj.15233 (PMC10149054; doi:10.7717/peerj.15233)
Supplement: Supplemental Information 3 [file peerj-11-15233-s003.xlsx]

## Sheet: Germination & Leaf Development
No	Block	Treatment	trt	Germination_%	Leaf Development Rate_per_WK
1	1	T4	4	0.64	1.9		Treatment	SEU Code/ Variety
4	1	T10	10	0.88	1.775		1	SEU2
7	1	T7	7	0.64	1.675		2	SEU6
10	1	T8	8	0.88	1.85		3	SEU9
13	1	T9	9	0.927	1.725		4	SEU10
16	1	T1	1	0.92	1.7		5	SEU14
19	1	T3	3	0.76	1.925		6	SEU15
22	1	T6	6	1	1.825		7	SEU16
25	1	T2	2	0.84	1.8		8	SEU17
28	1	T5	5	0.6	1.775		9	CV.Pacific-999
31	2	T7	7	0.64	1.725		10	CV.Bhadra
34	2	T4	4	0.72	2
37	2	T1	1	0.88	1.775
40	2	T2	2	0.56	1.85
43	2	T10	10	0.76	1.75
46	2	T5	5	0.56	1.875
49	2	T6	6	0.64	2
52	2	T3	3	0.64	1.7
55	2	T9	9	0.733	1.8
58	2	T8	8	0.6	1.975
61	3	T1	1	0.72	2.05
64	3	T9	9	0.728	1.825
67	3	T8	8	0.8	2.25
70	3	T7	7	0.84	1.625
73	3	T3	3	0.48	1.875
76	3	T5	5	0.52	1.975
79	3	T4	4	0.84	1.975
82	3	T10	10	0.8	1.675
85	3	T6	6	0.8	1.9
88	3	T2	2	0.76	1.75
91	4	T2	2	0.8	1.85
94	4	T3	3	0.84	1.875
97	4	T9	9	0.76	1.55
100	4	T4	4	0.96	1.55
103	4	T10	10	0.88	1.7
106	4	T6	6	0.8	1.725
109	4	T1	1	0.84	1.825
112	4	T8	8	0.64	2.125
115	4	T7	7	0.72	1.8
118	4	T5	5	0.32	1.925

## Sheet: Tasseling
No	Block	Treatment	50%_Tasseling
1	1	4	52
2	1	10	45
3	1	7	46
4	1	8	47
5	1	9	47
6	1	1	45
7	1	3	46
8	1	6	45
9	1	2	49
10	1	5	53
11	2	7	47
12	2	4	50
13	2	1	44
14	2	2	49
15	2	10	46
16	2	5	56
17	2	6	46
18	2	3	45
19	2	9	47
20	2	8	58
21	3	1	44
22	3	9	44
23	3	8	53
24	3	7	48
25	3	3	52
26	3	5	53
27	3	4	50
28	3	10	46
29	3	6	49
30	3	2	49
31	4	2	47
32	4	3	49
33	4	9	45
34	4	4	50
35	4	10	46
36	4	6	47
37	4	1	44
38	4	8	58
39	4	7	46
40	4	5	52

## Sheet: Average Plant Height
No	Block	Treatment	Trt	Replicate	Height_cm
1	1	T4	4	1	200
2	1	T4	4	2	206
3	1	T4	4	3	195
4	1	T4	4	4	192
5	1	T4	4	5	209
6	1	T10	10	1	160
7	1	T10	10	2	155
8	1	T10	10	3	196
9	1	T10	10	4	168
10	1	T10	10	5	163
11	1	T7	7	1	154
12	1	T7	7	2	168
13	1	T7	7	3	191
14	1	T7	7	4	122
15	1	T7	7	5	182
16	1	T8	8	1	223
17	1	T8	8	2	254
18	1	T8	8	3	245
19	1	T8	8	4	204
20	1	T8	8	5	226
21	1	T9	9	1	134
22	1	T9	9	2	153
23	1	T9	9	3	132
24	1	T9	9	4	169
25	1	T9	9	5	124
26	1	T1	1	1	168
27	1	T1	1	2	184
28	1	T1	1	3	188
29	1	T1	1	4	172
30	1	T1	1	5	204
31	1	T3	3	1	215
32	1	T3	3	2	172
33	1	T3	3	3	157
34	1	T3	3	4	184
35	1	T3	3	5	167
36	1	T6	6	1	181
37	1	T6	6	2	173
38	1	T6	6	3	154
39	1	T6	6	4	134
40	1	T6	6	5	185
41	1	T2	2	1	161
42	1	T2	2	2	149
43	1	T2	2	3	170
44	1	T2	2	4	224
45	1	T2	2	5	180
46	1	T5	5	1	150
47	1	T5	5	2	167
48	1	T5	5	3	179
49	1	T5	5	4	213
50	1	T5	5	5	203
51	2	T7	7	1	183
52	2	T7	7	2	157
53	2	T7	7	3	152
54	2	T7	7	4	223
55	2	T7	7	5	158
56	2	T4	4	1	213
57	2	T4	4	2	174
58	2	T4	4	3	203
59	2	T4	4	4	177
60	2	T4	4	5	207
61	2	T1	1	1	148
62	2	T1	1	2	165
63	2	T1	1	3	173
64	2	T1	1	4	194
65	2	T1	1	5	185
66	2	T2	2	1	196
67	2	T2	2	2	187
68	2	T2	2	3	163
69	2	T2	2	4	151
70	2	T2	2	5	171
71	2	T10	10	1	147
72	2	T10	10	2	133
73	2	T10	10	3	136
74	2	T10	10	4	178
75	2	T10	10	5	170
76	2	T5	5	1	158
77	2	T5	5	2	161
78	2	T5	5	3	205
79	2	T5	5	4	213
80	2	T5	5	5	203
81	2	T6	6	1	160
82	2	T6	6	2	185
83	2	T6	6	3	162
84	2	T6	6	4	196
85	2	T6	6	5	164
86	2	T3	3	1	224
87	2	T3	3	2	188
88	2	T3	3	3	155
89	2	T3	3	4	216
90	2	T3	3	5	170
91	2	T9	9	1	177
92	2	T9	9	2	164
93	2	T9	9	3	152
94	2	T9	9	4	150
95	2	T9	9	5	167
96	2	T8	8	1	232
97	2	T8	8	2	173
98	2	T8	8	3	193
99	2	T8	8	4	187
100	2	T8	8	5	224
101	3	T1	1	1	247
102	3	T1	1	2	242
103	3	T1	1	3	224
104	3	T1	1	4	201
105	3	T1	1	5	207
106	3	T9	9	1	172
107	3	T9	9	2	179
108	3	T9	9	3	152
109	3	T9	9	4	176
110	3	T9	9	5	164
111	3	T8	8	1	255
112	3	T8	8	2	223
113	3	T8	8	3	226
114	3	T8	8	4	203
115	3	T8	8	5	234
116	3	T7	7	1	183
117	3	T7	7	2	173
118	3	T7	7	3	182
119	3	T7	7	4	149
120	3	T7	7	5	184
121	3	T3	3	1	165
122	3	T3	3	2	147
123	3	T3	3	3	172
124	3	T3	3	4	184
125	3	T3	3	5	154
126	3	T5	5	1	197
127	3	T5	5	2	182
128	3	T5	5	3	215
129	3	T5	5	4	242
130	3	T5	5	5	181
131	3	T4	4	1	181
132	3	T4	4	2	194
133	3	T4	4	3	198
134	3	T4	4	4	242
135	3	T4	4	5	224
136	3	T10	10	1	193
137	3	T10	10	2	148
138	3	T10	10	3	156
139	3	T10	10	4	157
140	3	T10	10	5	187
141	3	T6	6	1	152
142	3	T6	6	2	142
143	3	T6	6	3	159
144	3	T6	6	4	180
145	3	T6	6	5	172
146	3	T2	2	1	177
147	3	T2	2	2	138
148	3	T2	2	3	157
149	3	T2	2	4	162
150	3	T2	2	5	171
151	4	T2	2	1	159
152	4	T2	2	2	162
153	4	T2	2	3	203
154	4	T2	2	4	195
155	4	T2	2	5	169
156	4	T3	3	1	181
157	4	T3	3	2	197
158	4	T3	3	3	178
159	4	T3	3	4	182
160	4	T3	3	5	140
161	4	T9	9	1	168
162	4	T9	9	2	179
163	4	T9	9	3	180
164	4	T9	9	4	162
165	4	T9	9	5	165
166	4	T4	4	1	192
167	4	T4	4	2	224
168	4	T4	4	3	185
169	4	T4	4	4	193
170	4	T4	4	5	197
171	4	T10	10	1	175
172	4	T10	10	2	173
173	4	T10	10	3	164
174	4	T10	10	4	180
175	4	T10	10	5	167
176	4	T6	6	1	207
177	4	T6	6	2	187
178	4	T6	6	3	177
179	4	T6	6	4	204
180	4	T6	6	5	206
181	4	T1	1	1	245
182	4	T1	1	2	226
183	4	T1	1	3	205
184	4	T1	1	4	234
185	4	T1	1	5	225
186	4	T8	8	1	176
187	4	T8	8	2	270
188	4	T8	8	3	235
189	4	T8	8	4	222
190	4	T8	8	5	221
191	4	T7	7	1	198
192	4	T7	7	2	192
193	4	T7	7	3	185
194	4	T7	7	4	178
195	4	T7	7	5	171
196	4	T5	5	1	184
197	4	T5	5	2	160
198	4	T5	5	3	162
199	4	T5	5	4	185
200	4	T5	5	5	156
