# Supplementary material for: Will future maize improvement programs leverage the canopy light-interception, photosynthetic, and biomass capacities of traditional accessions?
Source: PeerJ. 2023 Apr 27;11:e15233. doi: 10.7717/peerj.15233 (PMC10149054; doi:10.7717/peerj.15233)
Supplement: Supplemental Information 4 [file peerj-11-15233-s004.xlsx]

## Sheet: Sheet1
Block	Treatment	3WAP	6WAP	10WAP	Average LAI
1	4	0.958676	1.80789	2.15418	1.98415
1	4	1.02278	2.62815	2.80698	2.15264
1	4	0.754309	2.30371	2.48058	1.8462
1	4	0.7959	2.39714	2.43058	1.87454
1	10	1.24729	2.28523	2.31376	1.94876
1	10	1.65571	2.48306	2.70266	2.28048
1	10	1.86909	2.06846	2.50821	2.14859
1	10	1.59497	1.83484	2.45821	1.96267
1	7	1.43343	1.49253	3.36848	2.09815
1	7	1.42537	1.89455	2.45725	1.92572
1	7	1.21984	2.27103	2.91286	2.13458
1	7	1.28847	2.02635	2.86286	2.05923
1	8	1.10712	2.72573	2.40112	2.07799
1	8	1.20347	1.99501	3.35107	2.18318
1	8	0.996844	1.70246	2.87609	1.85847
1	8	1.27395	2.9887	2.82609	2.36291
1	9	0.628954	2.13777	2.2955	1.68741
1	9	0.469193	2.9252	2.19472	1.86304
1	9	0.582114	2.86579	2.24511	1.89767
1	9	0.561406	4.14922	2.19511	2.30191
1	1	1.10165	2.35754	2.04697	1.83539
1	1	1.10086	1.46093	2.63487	1.73222
1	1	1.29762	2.02772	2.34092	1.88875
1	1	1.15231	2.46275	2.29092	1.96866
1	3	1.44357	2.84831	1.70558	1.99915
1	3	1.22425	2.20797	3.14241	2.19154
1	3	1.1865	1.76221	2.424	1.7909
1	3	1.13538	2.35637	2.374	1.95525
1	6	1.35746	2.29675	3.06165	2.23862
1	6	1.55899	3.44355	3.07111	2.69122
1	6	1.77332	2.43762	3.06638	2.42577
1	6	1.65696	2.217	3.01638	2.29678
1	2	0.845649	1.9902	2.43944	1.75843
1	2	0.972086	3.58661	1.66077	2.07316
1	2	1.13418	2.23643	2.05011	1.80691
1	2	1.13988	1.98981	2.00011	1.70993
1	5	0.768213	1.72254	1.96693	1.48589
1	5	0.991502	1.67454	3.08294	1.91633
1	5	0.986872	1.7586	2.52493	1.7568
1	5	0.941228	2.914	2.47493	2.11006
2	7	1.18707	1.24035	3.03761	1.82168
2	7	1.12287	1.48658	3.35276	1.9874
2	7	1.01758	2.95038	3.19518	2.38772
2	7	0.952089	1.73919	3.14518	1.94549
2	4	1.37595	1.85299	2.59664	1.94186
2	4	1.40146	2.47632	3.00258	2.29346
2	4	2.01248	3.15281	2.79961	2.65497
2	4	1.38537	2.34589	2.74961	2.16029
2	1	1.91423	2.31132	2.38316	2.2029
2	1	1.95705	2.96255	2.58509	2.50156
2	1	1.84259	2.068	2.48412	2.13157
2	1	1.67956	1.87726	2.43412	1.99698
2	2	1.11287	2.8116	1.54836	1.82428
2	2	0.722156	3.15614	1.77524	1.88451
2	2	0.740688	2.60891	1.6618	1.67047
2	2	0.904112	2.01736	1.6118	1.51109
2	10	1.22893	3.21148	1.57586	2.00542
2	10	1.42779	3.22239	1.78782	2.146
2	10	1.18423	2.89184	1.68184	1.9193
2	10	1.14034	2.18548	1.63184	1.65255
2	5	0.761048	1.98154	1.07153	1.27137
2	5	0.82018	3.57555	1.13192	1.84255
2	5	0.757141	2.30907	1.10172	1.38931
2	5	0.84112	2.72202	1.05172	1.53829
2	6	1.06464	2.61051	1.49236	1.7225
2	6	1.18027	2.61873	1.63512	1.81137
2	6	0.997773	3.17636	1.56374	1.91262
2	6	1.77312	3.64469	1.51374	2.31052
2	3	2.16947	2.56886	1.25015	1.99616
2	3	1.89599	3.98162	1.18945	2.35568
2	3	1.33034	3.45818	1.2198	2.00278
2	3	1.20059	3.29117	1.1698	1.88719
2	9	1.14089	2.97718	0.778615	1.63223
2	9	1.0923	2.71733	0.735864	1.51516
2	9	0.591457	3.8711	0.75724	1.73993
2	9	1.27685	2.66889	0.70724	1.55099
2	8	1.53641	2.44999	1.23724	1.74121
2	8	1.58619	2.49002	1.28619	1.78747
2	8	1.351	3.00327	1.26171	1.872
2	8	1.55526	2.80739	1.21171	1.85812
3	1	1.76505	3.46543	2.35951	2.53
3	1	1.25897	3.89237	2.25749	2.46961
3	1	1.39837	3.94217	2.3085	2.54968
3	1	1.24656	3.833	2.2585	2.44602
3	9	1.16206	2.41627	1.32094	1.63309
3	9	1.93735	2.95307	1.47821	2.12288
3	9	1.03217	1.96863	1.39957	1.46679
3	9	1.27387	1.97734	1.34957	1.53359
3	8	2.3118	3.94797	2.39738	2.88572
3	8	2.29371	3.09939	2.17866	2.52392
3	8	2.50905	2.85558	2.28802	2.55089
3	8	2.1538	2.86585	2.23802	2.41922
3	7	1.21237	2.68438	1.75905	1.88527
3	7	1.06594	2.91398	1.75072	1.91021
3	7	1.56091	2.58844	1.75489	1.96808
3	7	1.26448	2.81769	1.70489	1.92902
3	3	1.14932	2.60593	1.41053	1.72193
3	3	1.28489	2.44331	1.59686	1.77502
3	3	0.863247	3.74191	1.5037	2.03628
3	3	1.04525	2.19563	1.4537	1.56486
3	5	0.979859	2.36498	1.55919	1.63468
3	5	1.18627	2.7674	1.43669	1.79679
3	5	0.948317	2.13937	1.49794	1.52854
3	5	1.04415	2.21103	1.44794	1.56771
3	4	2.38049	2.70068	1.55559	2.21225
3	4	1.62577	3.95109	1.96626	2.51438
3	4	1.48315	3.16729	1.76092	2.13712
3	4	1.46084	3.21577	1.71092	2.12918
3	10	0.913887	2.81526	1.36996	1.6997
3	10	1.306	1.91089	1.78027	1.66572
3	10	1.20985	2.33866	1.57512	1.70787
3	10	2.01895	2.54497	1.52512	2.02968
3	6	1.44047	3.39163	1.41025	2.08078
3	6	1.96286	2.98208	1.91405	2.28633
3	6	1.81665	3.23206	1.66215	2.23695
3	6	0.923852	3.08944	1.61215	1.87515
3	2	0.935934	2.30715	1.43551	1.55953
3	2	0.819814	2.64113	1.77704	1.74599
3	2	1.12894	2.4223	1.60628	1.71917
3	2	1.11673	2.59319	1.55628	1.7554
4	2	1.1741	2.84808	2.19541	2.07253
4	2	1.43082	2.91975	1.84586	2.06548
4	2	1.35054	2.42332	2.02063	1.9315
4	2	1.40402	3.00877	1.97063	2.12781
4	3	1.46303	3.53334	1.59154	2.19597
4	3	1.7758	3.50987	1.87726	2.38764
4	3	1.73892	3.77938	1.7344	2.41757
4	3	1.25043	3.41923	1.6844	2.11802
4	9	0.91102	3.76685	2.17816	2.28534
4	9	0.791158	3.50058	1.70239	1.99804
4	9	1.32402	4.16497	1.94028	2.47642
4	9	0.879095	3.39037	1.89028	2.05325
4	4	1.31377	2.03263	1.81136	1.71925
4	4	1.59218	2.26445	2.78105	2.21256
4	4	1.22517	1.92158	2.29621	1.81432
4	4	0.823504	2.68519	2.24621	1.9183
4	10	1.49514	1.95758	2.35941	1.93738
4	10	1.60991	1.97283	1.61565	1.7328
4	10	1.77121	1.93446	1.98753	1.89773
4	10	1.41939	1.46524	1.93753	1.60739
4	6	1.39681	2.88773	1.83742	2.04065
4	6	1.47396	2.90903	2.4602	2.28106
4	6	1.58239	3.00097	2.14881	2.24406
4	6	1.38583	2.90144	2.09881	2.12869
4	1	1.65833	4.63585	2.44705	2.91374
4	1	1.63955	3.92108	1.8466	2.46908
4	1	2.5616	3.14526	2.14683	2.6179
4	1	1.71512	4.02315	2.09683	2.6117
4	8	1.2126	2.57119	1.98858	1.92413
4	8	1.16923	3.32263	2.48896	2.32694
4	8	1.23905	2.32119	2.23877	1.933
4	8	0.825347	4.21473	2.18877	2.40962
4	7	1.61671	2.77913	1.31814	1.90466
4	7	1.69257	1.80518	1.84543	1.78106
4	7	1.70183	2.69803	1.58179	1.99388
4	7	1.50144	2.38092	1.53179	1.80472
4	5	2.09623	2.38218	1.55578	2.0114
4	5	1.80264	2.26306	1.86684	1.97751
4	5	1.15309	2.8105	1.71131	1.89163
4	5	1.02831	2.59153	1.66131	1.76039
