# Supplementary material for: Will future maize improvement programs leverage the canopy light-interception, photosynthetic, and biomass capacities of traditional accessions?
Source: PeerJ. 2023 Apr 27;11:e15233. doi: 10.7717/peerj.15233 (PMC10149054; doi:10.7717/peerj.15233)
Supplement: Supplemental Information 5 [file peerj-11-15233-s005.xlsx]

## Sheet: Sheet1
Treatment	Block	Stages	Above PAR	Below PAR	Ammount of PAR Attunation	Percentage of PAR attunation%
1	1	3	1327.2	701.7	625.5	0.471293
1	1	3	1332.7	706.5	626.2	0.469873
1	1	3	1418.9	698	720.9	0.50807
1	1	3	1268	633.7	634.3	0.500237
1	1	3	1243.4	666.9	576.5	0.463648
1	2	3	1717.2	983	734.2	0.427556
1	2	3	1714.8	666.5	1048.3	0.611325
1	2	3	1683.3	634.3	1049	0.623181
1	2	3	1718.3	691.4	1026.9	0.597626
1	2	3	1693.5	733.9	959.6	0.566637
1	3	3	1928	1145.5	782.5	0.405861
1	3	3	1953	885.9	1067.1	0.54639
1	3	3	1989	1139.1	849.9	0.4273
1	3	3	1950.9	1043.1	907.8	0.465324
1	3	3	1966.3	1128.4	837.9	0.42613
1	4	3	2113.7	1032.2	1081.5	0.511662
1	4	3	2109.1	1038.1	1071	0.5078
1	4	3	2109.8	696.8	1413	0.669732
1	4	3	2108.1	1003.8	1104.3	0.523837
1	4	3	2115.6	1264.6	851	0.40225
1	1	6	1287.1	630.1	657	0.51045
1	1	6	2229.2	826.9	1402.3	0.62906
1	1	6	1073.8	390.3	683.5	0.636524
1	1	6	1787.6	706	1081.6	0.605057
1	1	6	2113.1	750.4	1362.7	0.644882
1	2	6	1793.7	547.2	1246.5	0.694932
1	2	6	1769.2	382.7	1386.5	0.783688
1	2	6	1794.3	621.6	1172.7	0.65357
1	2	6	1784.9	789.2	995.7	0.557846
1	2	6	1630.9	599.3	1031.6	0.632534
1	3	6	1863	354.6	1508.4	0.809662
1	3	6	1729.3	251.9	1477.4	0.854334
1	3	6	1734.4	248.7	1485.7	0.856607
1	3	6	1798.1	281.2	1516.9	0.843613
1	3	6	1572.5	490.1	1082.4	0.688331
1	4	6	1932.9	252.2	1680.7	0.869522
1	4	6	1951.1	351.5	1599.6	0.819845
1	4	6	1983.3	507.8	1475.5	0.743962
1	4	6	1896.8	318.3	1578.5	0.832191
1	4	6	1999.2	699.3	1299.9	0.65021
1	1	10	2048.4	839.6	1208.8	0.590119
1	1	10	2101.4	668	1433.4	0.682117
1	2	10	2500.1	913.6	1586.5	0.634575
1	2	10	2332	783.3	1548.7	0.664108
1	3	10	2040.5	392.2	1648.3	0.807792
1	3	10	2167	450.1	1716.9	0.792293
1	4	10	2358.2	552	1806.2	0.765923
1	4	10	2457.6	823.8	1633.8	0.664795
2	1	3	1272.9	835.3	437.6	0.343782
2	1	3	1323.3	809.6	513.7	0.388196
2	1	3	1277.5	713.9	563.6	0.441174
2	1	3	1254.2	629.3	624.9	0.498246
2	1	3	1232.9	610.3	622.6	0.504988
2	2	3	1699	976.2	722.8	0.425427
2	2	3	1592	1097.2	494.8	0.310804
2	2	3	1386.4	952.5	433.9	0.312969
2	2	3	1614.4	1104.6	509.8	0.315783
2	2	3	1641.9	1036.9	605	0.368476
2	3	3	2050.7	1456.9	593.8	0.28956
2	3	3	2017	1343.2	673.8	0.33406
2	3	3	2057.1	1446.8	610.3	0.29668
2	3	3	2064.8	1271.8	793	0.384057
2	3	3	2038.3	1259.3	779	0.382181
2	4	3	2027.5	1295.8	731.7	0.360888
2	4	3	2035.9	1226.8	809.1	0.397416
2	4	3	2064.8	1117.7	947.1	0.458688
2	1	5	1828.8	742.9	1085.9	0.593777
2	1	5	1914.2	392.2	1522	0.79511
2	1	5	1760.7	626.1	1134.6	0.644403
2	1	5	1828.8	742.9	1085.9	0.593777
2	1	5	2074.2	1112.8	961.4	0.463504
2	2	5	1828.8	742.9	1085.9	0.593777
2	2	5	1873.9	455.4	1418.5	0.756977
2	2	5	1914.2	392.2	1522	0.79511
2	2	5	1835.1	494.9	1340.2	0.730314
2	2	5	1760.7	626.1	1134.6	0.644403
2	3	5	1837.4	780	1057.4	0.575487
2	3	5	1908.5	671.4	1237.1	0.648205
2	3	5	1917.4	581.8	1335.6	0.696568
2	3	5	1954.5	662.5	1292	0.661039
2	3	5	1985.3	630.4	1354.9	0.682466
2	4	5	1977	572.4	1404.6	0.71047
2	4	5	1947.6	337.3	1610.3	0.826812
2	4	5	1936.2	535.7	1400.5	0.723324
2	4	5	1963.8	681.6	1282.2	0.652918
2	4	5	1989	539.9	1449.1	0.728557
2	1	10	1982.6	678.4	1304.2	0.657823
2	1	10	2042.7	998.8	1043.9	0.511039
2	2	10	1939.3	981.7	957.6	0.493786
2	2	10	1904.1	866.1	1038	0.545139
2	3	10	1456.1	574.1	882	0.605728
2	3	10	2269.8	729.4	1540.4	0.67865
2	4	10	2282.2	569.7	1712.5	0.750372
2	4	10	2189.5	684.2	1505.3	0.687509
3	1	3	1302.4	557.1	745.3	0.572251
3	1	3	1357.9	677.7	680.2	0.500921
3	1	3	1325.4	714	611.4	0.461295
3	1	3	1217.2	580.9	636.3	0.522757
3	1	3	1278.8	648.7	630.1	0.492728
3	2	3	1524.8	475.4	1049.4	0.688221
3	2	3	1528	552	976	0.638743
3	2	3	1520.2	879.7	640.5	0.421326
3	2	3	1516.9	739.3	777.6	0.512624
3	2	3	1549.7	815.8	733.9	0.473576
3	3	3	2066.4	1256.7	809.7	0.391841
3	3	3	2068.4	1186.5	881.9	0.426368
3	3	3	2068.7	1424.3	644.4	0.3115
3	3	3	2059.6	1602.6	457	0.221888
3	3	3	2068.2	1316.7	751.5	0.363359
3	4	3	2085	1112.9	972.1	0.466235
3	4	3	2091.4	976	1115.4	0.533327
3	4	3	2095	1262.7	832.3	0.397279
3	1	5	2095.8	632.9	1462.9	0.698015
3	1	5	2151.2	850.3	1300.9	0.604732
3	1	5	2011.5	943.1	1068.4	0.531146
3	1	5	2072.6	767.9	1304.7	0.629499
3	1	5	2121.7	1032.9	1088.8	0.513173
3	2	5	1901.3	553.5	1347.8	0.708883
3	2	5	1930	707.7	1222.3	0.633316
3	2	5	1919.1	285.1	1634	0.851441
3	2	5	1955.2	374	1581.2	0.808715
3	2	5	1919.9	398.5	1521.4	0.792437
3	3	5	1719.3	485.1	1234.2	0.71785
3	3	5	1578.5	454.4	1124.1	0.712132
3	3	5	1896.3	336.7	1559.6	0.822444
3	3	5	1881	679.7	1201.3	0.63865
3	3	5	1892.6	771.2	1121.4	0.592518
3	4	5	2000.2	434.8	1565.4	0.782622
3	4	5	2010.7	443.8	1566.9	0.779281
3	4	5	1933.3	366.5	1566.8	0.810428
3	4	5	1905	529.2	1375.8	0.722205
3	4	5	1900.1	416.5	1483.6	0.780801
3	1	10	1623.2	699.4	923.8	0.569123
3	1	10	1934.6	473.8	1460.8	0.755091
3	2	10	745.9	261.1	484.8	0.649953
3	2	10	621.2	222.8	398.4	0.641339
3	3	10	2089.9	816.2	1273.7	0.609455
3	3	10	2150.1	745.1	1405	0.653458
3	4	10	2165.9	797	1368.9	0.632024
3	4	10	1975.6	609.8	1365.8	0.691334
4	1	3	1793.7	1150.9	642.8	0.358365
4	1	3	1687.2	1033.5	653.7	0.387447
4	1	3	1521.7	1031.9	489.8	0.321877
4	1	3	1418	946.9	471.1	0.332228
4	1	3	1261.7	780	481.7	0.381786
4	2	3	1650.8	829.4	821.4	0.497577
4	2	3	1701.1	852.5	848.6	0.498854
4	2	3	1686.6	622.1	1064.5	0.631151
4	2	3	1696.5	855	841.5	0.496021
4	2	3	1703.1	888.4	814.7	0.478363
4	3	3	2008.7	710.7	1298	0.646189
4	3	3	2083.4	1034.2	1049.2	0.5036
4	3	3	2075.1	1111	964.1	0.464604
4	3	3	2077.1	1096.9	980.2	0.471908
4	3	3	2080	1109.2	970.8	0.466731
4	4	3	2103	1195.5	907.5	0.431526
4	4	3	2091.4	1054.6	1036.8	0.495744
4	4	3	2069.6	1404.7	664.9	0.32127
4	1	5	2217.1	1141.1	1076	0.485319
4	1	5	2173.5	1009.6	1163.9	0.535496
4	1	5	2130.8	699.3	1431.5	0.671813
4	1	5	2228.7	839.6	1389.1	0.623278
4	1	5	2242.6	812.4	1430.2	0.637742
4	2	5	1630.3	817.4	812.9	0.49862
4	2	5	1444.6	502.8	941.8	0.651945
4	2	5	1515.1	382.4	1132.7	0.747607
4	2	5	1610.5	292.8	1317.7	0.818193
4	2	5	1503.3	407.6	1095.7	0.728863
4	3	5	1718.8	467.4	1251.4	0.728066
4	3	5	1925.2	319.3	1605.9	0.834147
4	3	5	1930.9	458.9	1472	0.762339
4	3	5	1889.3	432.2	1457.1	0.771238
4	3	5	1985.6	622.8	1362.8	0.686342
4	4	5	1333.5	812.1	521.4	0.391001
4	4	5	1897.1	769.5	1127.6	0.594381
4	4	5	1969.9	735.5	1234.4	0.626631
4	4	5	1964.6	850.5	1114.1	0.567087
4	4	5	1938.6	596.7	1341.9	0.692201
4	1	10	2006	763.7	1242.3	0.619292
4	1	10	2136.9	609	1527.9	0.715008
4	2	10	2396.9	795.3	1601.6	0.668196
4	2	10	2105.9	589.7	1516.2	0.719977
4	3	10	2138.8	772.2	1366.6	0.638956
4	3	10	2152.8	596.4	1556.4	0.722965
4	4	10	2256.2	735.4	1520.8	0.674054
4	4	10	1953.8	355.1	1598.7	0.818252
5	1	3	1241	774.6	466.4	0.375826
5	1	3	1307	849.5	457.5	0.350038
5	1	3	1401.8	808.7	593.1	0.423099
5	1	3	1444.4	845.9	598.5	0.414359
5	1	3	1545.4	950.4	595	0.385014
5	2	3	1406	917.3	488.7	0.347582
5	2	3	1330.3	823.8	506.5	0.380741
5	2	3	1145	697.5	447.5	0.39083
5	2	3	1122.9	642.3	480.6	0.427999
5	3	3	2018.2	1317.1	701.1	0.347389
5	3	3	2063.9	1237	826.9	0.400649
5	3	3	2069.1	1374.4	694.7	0.33575
5	3	3	2085.9	1476.5	609.4	0.292152
5	3	3	2094.7	1335.5	759.2	0.362439
5	4	3	2180	1555.3	624.7	0.28656
5	4	3	2193.5	881.1	1312.4	0.598313
5	4	3	2236.5	1020.4	1216.1	0.543751
5	1	5	1894.6	881	1013.6	0.534994
5	1	5	2022.5	986.5	1036	0.512237
5	1	5	2030.1	956.8	1073.3	0.528693
5	1	5	1999.3	1012.4	986.9	0.493623
5	1	5	1623.4	392.3	1231.1	0.758347
5	2	5	1543.7	533	1010.7	0.654726
5	2	5	1843.9	316.1	1527.8	0.82857
5	2	5	1886.6	612.8	1273.8	0.675183
5	2	5	1081.3	488.4	592.9	0.548321
5	2	5	1623.4	392.3	1231.1	0.758347
5	3	5	1177.4	588.9	588.5	0.49983
5	3	5	1879.1	629.1	1250	0.665212
5	3	5	1932.7	547.8	1384.9	0.716562
5	3	5	1933.7	730.2	1203.5	0.622382
5	3	5	1954.2	719.4	1234.8	0.63187
5	4	5	1733.5	570.8	1162.7	0.670724
5	4	5	1723	597.2	1125.8	0.653395
5	4	5	1698.3	450.1	1248.2	0.73497
5	4	5	1422	348.8	1073.2	0.754712
5	4	5	1877.8	360.8	1517	0.80786
5	1	10	2133.7	917.6	1216.1	0.569949
5	1	10	2034.4	540.1	1494.3	0.734516
5	2	10	705.2	283.5	421.7	0.597986
5	2	10	676.3	256.6	419.7	0.620583
5	3	10	2001.7	714.9	1286.8	0.642854
5	3	10	2030.5	788.9	1241.6	0.611475
5	4	10	2131.6	866.8	1264.8	0.593357
5	4	10	1379.8	437.8	942	0.682708
6	1	3	1383	647.2	735.8	0.532032
6	1	3	1394.2	586.2	808	0.579544
6	1	3	1358.3	638.6	719.7	0.529853
6	1	3	1335	480.3	854.7	0.640225
6	1	3	1325.4	506.9	818.5	0.617549
6	2	3	1559.8	889.1	670.7	0.429991
6	2	3	1467.8	945.1	522.7	0.356111
6	2	3	1374.5	699.5	675	0.491088
6	2	3	1434.5	823.3	611.2	0.426072
6	2	3	1405.4	516.7	888.7	0.632347
6	3	3	2043.5	1098.8	944.7	0.462295
6	3	3	2033.3	870.5	1162.8	0.571878
6	3	3	2022.8	920	1102.8	0.545185
6	3	3	1976.9	1316.7	660.2	0.333957
6	3	3	2029.9	1408.3	621.6	0.306222
6	4	3	2082.2	1139.9	942.3	0.45255
6	4	3	2109.7	1116.9	992.8	0.470588
6	4	3	2056	1038.5	1017.5	0.494893
6	1	5	2124.2	808.8	1315.4	0.619245
6	1	5	2076.3	854	1222.3	0.588691
6	1	5	2199.8	517.1	1682.7	0.764933
6	1	5	1631.2	499.6	1131.6	0.693722
6	1	5	2100.6	826.8	1273.8	0.606398
6	2	5	1774.2	480	1294.2	0.729456
6	2	5	1646.6	424.9	1221.7	0.741953
6	2	5	1685.4	332	1353.4	0.803014
6	2	5	1654.5	252.8	1401.7	0.847205
6	2	5	1535.9	440.4	1095.5	0.713263
6	3	5	1990.8	442.5	1548.3	0.777728
6	3	5	1929.1	501.9	1427.2	0.739827
6	3	5	1905.1	565.1	1340	0.703375
6	3	5	1905.6	439.2	1466.4	0.769521
6	3	5	1975.4	500	1475.4	0.746887
6	4	5	1996.3	1201.3	795	0.398237
6	4	5	2029.4	590.9	1438.5	0.70883
6	4	5	1958.4	550.5	1407.9	0.718903
6	4	5	1791.8	454.2	1337.6	0.746512
6	4	5	1950.3	548.5	1401.8	0.718761
6	1	10	2003.5	524.2	1479.3	0.738358
6	1	10	2219	589.8	1629.2	0.734205
6	2	10	741.3	211.3	530	0.71496
6	2	10	1090.9	356.2	734.7	0.673481
6	3	10	1937.1	778.2	1158.9	0.598265
6	3	10	1833	533.6	1299.4	0.708893
6	4	10	2413.5	792.3	1621.2	0.671722
6	4	10	2155.5	487.7	1667.8	0.773742
7	1	3	1731.2	879.5	851.7	0.491971
7	1	3	1809	937.1	871.9	0.481979
7	1	3	1809.7	1077.7	732	0.404487
7	1	3	1787.5	1014.2	773.3	0.432615
7	1	3	1787.5	982.2	805.3	0.450517
7	2	3	1733.2	975.2	758	0.437341
7	2	3	1721.1	996.7	724.4	0.420894
7	2	3	1722.1	1048	674.1	0.391441
7	2	3	1703	1170.5	532.5	0.312683
7	2	3	1682.5	1050.5	632	0.375632
7	3	3	2069.7	1223.5	846.2	0.408852
7	3	3	2048.5	1290.6	757.9	0.369978
7	3	3	2068.6	1051.9	1016.7	0.491492
7	3	3	2060.8	1191.8	869	0.421681
7	3	3	2058.2	1391.7	666.5	0.323827
7	4	3	2078.3	1030.7	1047.6	0.504066
7	4	3	2119.2	1016.7	1102.5	0.520243
7	4	3	2050.4	979.4	1071	0.522337
7	1	5	2004.8	1052.1	952.7	0.475209
7	1	5	2114	1128.8	985.2	0.466036
7	1	5	2175.2	977.4	1197.8	0.550662
7	1	5	2199.2	843.2	1356	0.616588
7	1	5	2161.4	919.1	1242.3	0.574766
7	2	5	1982.7	1153.9	828.8	0.418016
7	2	5	2004.8	1052.1	952.7	0.475209
7	2	5	2038.8	574.3	1464.5	0.718315
7	2	5	2114.6	1007.3	1107.3	0.523645
7	2	5	1929.3	561.3	1368	0.709065
7	3	5	1773.4	438.7	1334.7	0.752622
7	3	5	1795.5	523.4	1272.1	0.708493
7	3	5	1788.3	723.1	1065.2	0.595649
7	3	5	1756.4	453.2	1303.2	0.741972
7	3	5	1870.3	540	1330.3	0.711276
7	4	5	1905.8	857.1	1048.7	0.550268
7	4	5	1921.3	584.9	1336.4	0.695571
7	4	5	1941.2	683.5	1257.7	0.647898
7	4	5	1890.9	853.9	1037	0.548416
7	1	10	1963.1	432.6	1530.5	0.779634
7	1	10	2151.6	729.1	1422.5	0.661136
7	2	10	2347.3	643.8	1703.5	0.725727
7	2	10	2346.6	564	1782.6	0.759652
7	3	10	2132.1	653.7	1478.4	0.693401
7	3	10	2172.3	673.6	1498.7	0.689914
7	4	10	2171.5	1002.3	1169.2	0.53843
7	4	10	1809.8	619.9	1189.9	0.657476
8	1	3	1803.8	1165.5	638.3	0.353864
8	1	3	1777.1	1060.3	716.8	0.403354
8	1	3	1656.7	923.1	733.6	0.442808
8	1	3	1536	921.8	614.2	0.39987
8	1	3	1489.7	763.6	726.1	0.487414
8	2	3	1617.1	932.6	684.5	0.423289
8	2	3	1596.7	706.3	890.4	0.55765
8	2	3	1570.9	671.8	899.1	0.572347
8	2	3	1534.7	737.7	797	0.51932
8	2	3	1549.3	668.7	880.6	0.568386
8	3	3	2078.9	760.8	1318.1	0.634037
8	3	3	2067.2	762.9	1304.3	0.63095
8	3	3	2075.6	698	1377.6	0.663712
8	3	3	2069.1	812.3	1256.8	0.607414
8	3	3	2075.4	936	1139.4	0.549003
8	4	3	2051.5	1470.2	581.3	0.283354
8	4	3	2078.7	1229.5	849.2	0.408525
8	4	3	2070.2	1247.5	822.7	0.397401
8	4	3	2068.4	1209.1	859.3	0.415442
8	4	3	2065.8	1444.5	621.3	0.300755
8	1	5	1843.1	538.3	1304.8	0.707938
8	1	5	2028.5	863.1	1165.4	0.574513
8	1	5	2162	1054.8	1107.2	0.512118
8	1	5	1912.1	509.1	1403	0.733748
8	1	5	2141	1155	986	0.460532
8	2	5	1894.5	588.7	1305.8	0.689258
8	2	5	1926.9	627.5	1299.4	0.674347
8	2	5	1937.5	598.6	1338.9	0.691045
8	2	5	1943	472.3	1470.7	0.756922
8	2	5	1911.6	506.6	1405	0.734986
8	3	5	1843.1	538.3	1304.8	0.707938
8	3	5	1934.1	313.1	1621	0.838116
8	3	5	1916.9	456.2	1460.7	0.762012
8	3	5	1912.1	509.1	1403	0.733748
8	3	5	1886.8	495.9	1390.9	0.737174
8	4	5	2002.8	661.7	1341.1	0.669613
8	4	5	1963.1	461.6	1501.5	0.764862
8	4	5	1588.3	503.7	1084.6	0.682868
8	4	5	1956.5	310.8	1645.7	0.841145
8	4	5	1930.8	644.9	1285.9	0.665993
8	1	10	2142.1	784.6	1357.5	0.633724
8	1	10	2065.4	792	1273.4	0.616539
8	2	10	560.3	286.9	273.4	0.487953
8	2	10	536.7	285.9	250.8	0.4673
8	3	10	1957.4	792.3	1165.1	0.595228
8	3	10	2125.8	775.8	1350	0.635055
8	4	10	2169.2	557.9	1611.3	0.742808
8	4	10	2271.9	789.6	1482.3	0.652449
9	1	3	1432.9	1019.3	413.6	0.288645
9	1	3	1410.1	1108.2	301.9	0.214098
9	1	3	1418.8	1098.1	320.7	0.226036
9	1	3	1383.9	1000.2	383.7	0.27726
9	1	3	1378.3	1006.6	371.7	0.26968
9	2	3	1512.6	815.1	697.5	0.461127
9	2	3	1565.4	874.9	690.5	0.441101
9	2	3	1537.6	1118.4	419.2	0.272633
9	2	3	1579.7	1152	427.7	0.270748
9	2	3	1619.1	826.9	792.2	0.489284
9	3	3	1984.4	1423.6	560.8	0.282604
9	3	3	1993.2	1193.3	799.9	0.401314
9	3	3	1998.9	851.4	1147.5	0.574066
9	3	3	1978.2	1251.9	726.3	0.367152
9	3	3	1977.7	1124.5	853.2	0.43141
9	4	3	2134	1443	691	0.323805
9	4	3	2125.9	1564.7	561.2	0.263982
9	4	3	2077.9	1479.1	598.8	0.288176
9	1	5	1792.5	673.4	1119.1	0.624324
9	1	5	1874.4	506.8	1367.6	0.72962
9	1	5	1804.7	488.3	1316.4	0.729429
9	1	5	1754.5	256.5	1498	0.853805
9	1	5	2197.6	1298.5	899.1	0.409128
9	2	5	1792.5	673.4	1119.1	0.624324
9	2	5	1980.8	480.8	1500	0.75727
9	2	5	1874.4	506.8	1367.6	0.72962
9	2	5	1754.5	256.5	1498	0.853805
9	2	5	1804.7	488.3	1316.4	0.729429
9	3	5	1869.7	596.2	1273.5	0.681125
9	3	5	1912.3	481.8	1430.5	0.748052
9	3	5	1860	732.6	1127.4	0.606129
9	3	5	1865.3	733.5	1131.8	0.606766
9	3	5	1840.3	668.1	1172.2	0.636961
9	4	5	1950.8	647.5	1303.3	0.668085
9	4	5	1914.6	362.2	1552.4	0.810822
9	4	5	1894	399.6	1494.4	0.789018
9	4	5	1905.4	301	1604.4	0.842028
9	4	5	1897.6	421.2	1476.4	0.778035
9	1	10	2142.1	784.6	1357.5	0.633724
9	1	10	2065.4	792	1273.4	0.616539
9	2	10	560.3	286.9	273.4	0.487953
9	2	10	536.7	285.9	250.8	0.4673
9	3	10	1957.4	792.3	1165.1	0.595228
9	3	10	2125.8	775.8	1350	0.635055
9	4	10	2169.2	557.9	1611.3	0.742808
9	4	10	2271.9	789.6	1482.3	0.652449
10	1	3	1330.5	827.4	503.1	0.378129
10	1	3	1577.5	844.1	733.4	0.464913
10	1	3	1685.7	761.8	923.9	0.548081
10	1	3	1652.2	666.3	985.9	0.59672
10	1	3	1677	778.2	898.8	0.535957
10	2	3	1522.7	792.8	729.9	0.479346
10	2	3	1507.2	702.4	804.8	0.53397
10	2	3	1508.7	801	707.7	0.469079
10	2	3	1545.9	847.4	698.5	0.45184
10	2	3	1531.6	1069.1	462.5	0.301972
10	3	3	1938.3	1542.2	396.1	0.204354
10	3	3	1938.4	1290.5	647.9	0.334245
10	3	3	1933.9	1080.6	853.3	0.441233
10	3	3	1923.1	1119.9	803.2	0.417659
10	3	3	2071.5	869.8	1201.7	0.580111
10	4	3	2130.6	1119.4	1011.2	0.474608
10	4	3	2125.3	1062.6	1062.7	0.500024
10	4	3	2130.2	993.3	1136.9	0.533706
10	1	5	2195.9	834.7	1361.2	0.619883
10	1	5	2083.5	728.7	1354.8	0.650252
10	1	5	2178.5	908.3	1270.2	0.583062
10	1	5	2121	1178.3	942.7	0.44446
10	1	5	2130.3	981	1149.3	0.539501
10	2	5	1818.9	360.8	1458.1	0.801638
10	2	5	1752.5	340.6	1411.9	0.805649
10	2	5	1859.3	447.1	1412.2	0.759533
10	2	5	1858.3	634.9	1223.4	0.658344
10	2	5	1831.4	619.1	1212.3	0.661953
10	3	5	1943.3	545.6	1397.7	0.71924
10	3	5	1789.9	728.7	1061.2	0.592882
10	3	5	1691.2	615.1	1076.1	0.636294
10	3	5	1789.4	596.5	1192.9	0.666648
10	3	5	1737.6	516.4	1221.2	0.702808
10	4	5	1711.6	682.1	1029.5	0.601484
10	4	5	1941.1	437.2	1503.9	0.774767
10	4	5	1728.8	688	1040.8	0.602036
10	4	5	2010.5	875.4	1135.1	0.564586
10	4	5	2008	1069.2	938.8	0.46753
10	1	10	2087.6	745.3	1342.3	0.642987
10	1	10	1999.3	601.4	1397.9	0.699195
10	2	10	2500.1	1290.9	1209.2	0.483661
10	2	10	1704	735	969	0.568662
10	3	10	1914.2	784.8	1129.4	0.590011
10	3	10	2264	713.5	1550.5	0.68485
10	4	10	2294.5	542.5	1752	0.763565
10	4	10	2308.8	862.7	1446.1	0.626343
