# Supplementary material for: Will future maize improvement programs leverage the canopy light-interception, photosynthetic, and biomass capacities of traditional accessions?
Source: PeerJ. 2023 Apr 27;11:e15233. doi: 10.7717/peerj.15233 (PMC10149054; doi:10.7717/peerj.15233)
Supplement: Supplemental Information 6 [file peerj-11-15233-s006.xlsx]

## Sheet: SEU 2
3 WAP						5 WAP						10 WAP
Above PAR	Below PAR	I/Io	LAI	ln(I/Io)		Above PAR	Below PAR	I/Io	LAI	ln(I/Io)		Above PAR	Below PAR	I/Io	LAI	ln(I/Io)
1327.2	701.7	0.528707	0.93	-0.637321		1287.1	630.1	0.48955	1.1	-0.714268		2048.4	839.6	0.409881	2.33	-0.891889
1332.7	706.5	0.530127	0.93	-0.634639		2229.2	826.9	0.37094	1.86	-0.991714		2101.4	668	0.317883	2.95	-1.14607
1418.9	698	0.49193	1.07	-0.709418		1073.8	390.3	0.363476	1.35	-1.01204		2500.1	913.6	0.365425	2.18	-1.00669
1268	633.7	0.499763	0.98	-0.69362		1787.6	706	0.394943	1.63	-0.929014		2332	783.3	0.335892	2.12	-1.09097
1243.4	666.9	0.536352	0.86	-0.622965		2113.1	750.4	0.355118	1.99	-1.0353		2040.5	392.2	0.192208	2.9	-1.64918
1717.2	983	0.572444	0.96	-0.557841		1793.7	547.2	0.305068	2.15	-1.18722		2167	450.1	0.207707	2.83	-1.57163
1714.8	666.5	0.388675	1.62	-0.945012		1769.2	382.7	0.216312	2.6	-1.53103		2358.2	552	0.234077	2.79	-1.45211
1683.3	634.3	0.376819	1.6	-0.975989		1794.3	621.6	0.34643	1.93	-1.06007		2457.6	823.8	0.335205	2.24	-1.09301
1718.3	691.4	0.402374	1.56	-0.910372		1784.9	789.2	0.442154	1.49	-0.816098
1693.5	733.9	0.433363	1.45	-0.83618		1630.9	599.3	0.367466	1.82	-1.00112
1928	1145.5	0.594139	1.43	-0.520642		1863	354.6	0.190338	2.89	-1.65895
1953	885.9	0.45361	1.81	-0.790518		1729.3	251.9	0.145666	3.26	-1.92644
1989	1139.1	0.5727	1.49	-0.557394		1734.4	248.7	0.143393	3.34	-1.94217
1950.9	1043.1	0.534676	1.58	-0.626094		1798.1	281.2	0.156387	3.28	-1.85542
1966.3	1128.4	0.57387	1.33	-0.555353		1572.5	490.1	0.311669	2.26	-1.16581
2113.7	1032.2	0.488338	1.8	-0.716748		1932.9	252.2	0.130478	3.58	-2.03655
2109.1	1038.1	0.4922	1.78	-0.708869		1951.1	351.5	0.180155	3.19	-1.71394
2109.8	696.8	0.330268				1983.3	507.8	0.256038	2.79	-1.36243
2108.1	1003.8	2.10012				1896.8	318.3	0.167809	3.07	-1.78493
2115.6	1264.6	1.67294				1999.2	699.3	0.34979	2.23	-1.05042

## Sheet: SEU6
3 WAP						5 WAP						10 WAP
Above PAR	Below PAR	I/Io	LAI	ln(I/Io)		Above PAR	Below PAR	I/Io	LAI	ln(I/Io)		Above PAR	Below PAR	I/Io	LAI	ln(I/Io)
1272.9	835.3	0.656218	0.61	-0.421262		1828.8	742.9	0.406223	1.6	-0.900854		1982.6	678.4	0.342177	2.45	-1.07243
1323.3	809.6	0.611804	0.72	-0.491344		1914.2	392.2	0.20489	2.73	-1.58528		2042.7	998.8	0.488961	1.86	-0.715473
1277.5	713.9	0.558826	0.84	-0.581917		1760.7	626.1	0.355597	2.17	-1.03396		1939.3	981.7	0.506214	1.28	-0.680797
1254.2	629.3	0.501754	0.97	-0.689645		1828.8	742.9	0.406223	1.6	-0.900854		1904.1	866.1	0.454861	1.48	-0.787764
1232.9	610.3	0.495012	0.98	-0.703174		2074.2	1112.8	0.536496	1.26	-0.622696		1456.1	574.1	0.394272	1.61	-0.930713
1699	976.2	0.574573	0.93	-0.554128		1828.8	742.9	0.406223	1.6	-0.900854		2269.8	729.4	0.32135	2.24	-1.13522
1592	1097.2	0.689196	0.62	-0.37223		1873.9	455.4	0.243023	2.54	-1.4146		2282.2	569.7	0.249628	2.7	-1.38779
1386.4	952.5	0.687031	0.58	-0.375376		1914.2	392.2	0.20489	2.73	-1.58528		2189.5	684.2	0.312491	2.49	-1.16318
1614.4	1104.6	0.684217	0.63	-0.37948		1835.1	494.9	0.269686	2.44	-1.3105
1641.9	1036.9	0.631524	0.77	-0.459619		1760.7	626.1	0.355597	2.17	-1.03396
2050.7	1456.9	0.71044	0.77	-0.34187		1837.4	780	0.424513	1.65	-0.856813
2017	1343.2	0.66594	0.77	-0.406556		1908.5	671.4	0.351795	2	-1.04471
2057.1	1446.8	0.70332	0.77	-0.351943		1917.4	581.8	0.303432	2.26	-1.1926
2064.8	1271.8	0.615943	1.03	-0.4846		1954.5	662.5	0.338961	2.18	-1.08187
2038.3	1259.3	0.617819	1.14	-0.48156		1985.3	630.4	0.317534	2.23	-1.14717
2027.5	1295.8	0.639112	1.05	-0.447675		1977	572.4	0.28953	2.49	-1.2395
2035.9	1226.8	0.602584	1.16	-0.506529		1947.6	337.3	0.173188	3.25	-1.75338
2064.8	1117.7	0.541312	1.55	-0.61376		1936.2	535.7	0.276676	2.47	-1.28491
						1963.8	681.6	0.347082	2.14	-1.05819
						1989	539.9	0.271443	2.6	-1.304

## Sheet: SEU9
3 WAP						5 WAP						5 WAP
Above PAR	Below PAR	I/Io	LAI	ln(I/Io)		Above PAR	Below PAR	I/Io	LAI	ln(I/Io)		Above PAR	Below PAR	I/Io	LAI	ln(I/Io)
1302.4	557.1	0.427749	1.2	-0.849219		2095.8	632.9	0.301985	2.34	-1.19738		1623.2	699.4	0.430877	1.78	-0.841932
1357.9	677.7	0.499079	1.03	-0.69499		2151.2	850.3	0.395268	1.91	-0.928192		1934.6	473.8	0.244909	2.94	-1.40687
1325.4	714	0.538705	0.93	-0.618587		2011.5	943.1	0.468854	1.55	-0.757464		745.9	261.1	0.350047	1.32	-1.04969
1217.2	580.9	0.477243	1.03	-0.73973		2072.6	767.9	0.370501	2.02	-0.9929		621.2	222.8	0.358661	1.25	-1.02538
1278.8	648.7	0.507272	0.96	-0.678707		2121.7	1032.9	0.486827	1.48	-0.719847		2089.9	816.2	0.390545	1.96	-0.940212
1524.8	475.4	0.311779	1.84	-1.16546		1901.3	553.5	0.291117	2.3	-1.23403		2150.1	745.1	0.346542	2.18	-1.05975
1528	552	0.361257	1.69	-1.01817		1930	707.7	0.366684	1.87	-1.00326		2165.9	797	0.367976	2.23	-0.999737
1520.2	879.7	0.578674	0.89	-0.547016		1919.1	285.1	0.148559	3.4	-1.90677		1975.6	609.8	0.308666	2.46	-1.1755
1516.9	739.3	0.487376	1.16	-0.71872		1955.2	374	0.191285	3.09	-1.65399
1549.7	815.8	0.526424	1.06	-0.641647		1919.9	398.5	0.207563	2.83	-1.57232
2066.4	1256.7	0.608159	1.17	-0.497319		1719.3	485.1	0.28215	2.28	-1.26532
2068.4	1186.5	0.573632	1.37	-0.555768		1578.5	454.4	0.287868	2.21	-1.24525
2068.7	1424.3	0.6885	0.89	-0.37324		1896.3	336.7	0.177556	2.86	-1.72847
2059.6	1602.6	0.778112	0.55	-0.250884		1881	679.7	0.36135	1.91	-1.01791
2068.2	1316.7	0.636641	1	-0.45155		1892.6	771.2	0.407482	1.76	-0.897759
2085	1112.9	0.533765	1.51	-0.6278		2000.2	434.8	0.217378	2.86	-1.52612
2091.4	976	0.466673	1.78	-0.762126		2010.7	443.8	0.220719	2.95	-1.51086
2095	1262.7	0.602721	1.06	-0.506301		1933.3	366.5	0.189572	3.42	-1.66299
						1905	529.2	0.277795	2.59	-1.28087
						1900.1	416.5	0.219199	2.74	-1.51778

## Sheet: SEU10
3 WAP						5 WAP						10 WAP
Above PAR	Below PAR	I/Io	LAI	ln(I/Io)		Above PAR	Below PAR	I/Io	LAI	ln(I/Io)		Above PAR	Below PAR	I/Io	LAI	ln(I/Io)
1793.7	1150.9	0.641635	0.81	-0.443736		2217.1	1141.1	0.514681	1.41	-0.664207		2006	763.7	0.380708	2.07	-0.965723
1687.2	1033.5	0.612553	0.83	-0.490119		2173.5	1009.6	0.464504	1.58	-0.766785		2136.9	609	0.284992	3.02	-1.25529
1521.7	1031.9	0.678123	0.62	-0.388426		2130.8	699.3	0.328187	2.26	-1.11417		2396.9	795.3	0.331804	2.58	-1.10321
1418	946.9	0.667772	0.61	-0.403809		2228.7	839.6	0.376722	2.04	-0.976248		2105.9	589.7	0.280023	2.6	-1.27288
1261.7	780	0.618214	0.68	-0.480921		2242.6	812.4	0.362258	2.25	-1.0154		2138.8	772.2	0.361044	2.13	-1.01876
1650.8	829.4	0.502423	1.17	-0.688313		1630.3	817.4	0.50138	1.2	-0.690391		2152.8	596.4	0.277035	2.67	-1.28361
1701.1	852.5	0.501146	1.12	-0.690857		1444.6	502.8	0.348055	1.8	-1.0554		2256.2	735.4	0.325946	2.3	-1.12102
1686.6	622.1	0.368849	1.66	-0.997369		1515.1	382.4	0.252393	2.32	-1.37677		1953.8	355.1	0.181748	2.98	-1.70513
1696.5	855	0.503979	1.19	-0.685221		1610.5	292.8	0.181807	2.78	-1.70481
1703.1	888.4	0.521637	1.15	-0.650783		1503.3	407.6	0.271137	2.11	-1.30513
2008.7	710.7	0.353811	2.47	-1.03899		1718.8	467.4	0.271934	2.29	-1.3022
2083.4	1034.2	0.4964	1.85	-0.700373		1925.2	319.3	0.165853	3.16	-1.79665
2075.1	1111	0.535396	1.58	-0.624749		1930.9	458.9	0.237661	2.76	-1.43691
2077.1	1096.9	0.528092	1.42	-0.638485		1889.3	432.2	0.228762	2.78	-1.47507
2080	1109.2	0.533269	1.47	-0.628729		1985.6	622.8	0.313658	2.42	-1.15945
2103	1195.5	0.568474	1.45	-0.5648		1333.5	812.1	0.608999	1.15	-0.495939
2091.4	1054.6	0.504256	1.68	-0.684672		1897.1	769.5	0.405619	1.81	-0.902341
2069.6	1404.7	0.67873	0.88	-0.387532		1969.9	735.5	0.373369	1.96	-0.985188
						1964.6	850.5	0.432913	1.67	-0.83722
						1938.6	596.7	0.307799	2.18	-1.17831

## Sheet: SEU14
3 WAP						5 WAP						10 WAP
Above PAR	Below PAR	I/Io	LAI	ln(I/Io)		Above PAR	Below PAR	I/Io	LAI	ln(I/Io)		Above PAR	Below PAR	I/Io	LAI	ln(I/Io)
1241	774.6	0.624174	0.67	-0.471326		1894.6	881	0.465006	1.67	-0.765705		2133.7	917.6	0.430051	2.25	-0.843851
1307	849.5	0.649962	0.66	-0.430842		2022.5	986.5	0.487763	1.63	-0.717926		2034.4	540.1	0.265484	2.75	-1.3262
1401.8	808.7	0.576901	0.85	-0.550084		2030.1	956.8	0.471307	1.59	-0.752246		705.2	283.5	0.402014	1.1	-0.911269
1444.4	845.9	0.585641	0.83	-0.535048		1999.3	1012.4	0.506377	1.31	-0.680473		676.3	256.6	0.379417	1.19	-0.969118
1545.4	950.4	0.614986	0.8	-0.486155		1623.4	392.3	0.241653	2.45	-1.42025		2001.7	714.9	0.357146	2.1	-1.02961
1406	917.3	0.652418	0.66	-0.427069		1543.7	533	0.345274	1.81	-1.06342		2030.5	788.9	0.388525	1.92	-0.945398
1330.3	823.8	0.619259	0.73	-0.479232		1843.9	316.1	0.17143	3.12	-1.76358		2131.6	866.8	0.406643	1.77	-0.89982
1145	697.5	0.60917	0.69	-0.495657		1886.6	612.8	0.324817	2.13	-1.12449		1379.8	437.8	0.317292	1.73	-1.14793
1122.9	642.3	0.572001	0.77	-0.558614		1081.3	488.4	0.451679	1.34	-0.794785
						1623.4	392.3	0.241653	2.45	-1.42025
2018.2	1317.1	0.652611	1.06	-0.426774		1177.4	588.9	0.50017	1.16	-0.692808
2063.9	1237	0.599351	1.34	-0.511908		1879.1	629.1	0.334788	2.13	-1.09426
2069.1	1374.4	0.66425	0.99	-0.409096		1932.7	547.8	0.283438	2.47	-1.26076
2085.9	1476.5	0.707848	0.8	-0.345526		1933.7	730.2	0.377618	1.99	-0.973872
2094.7	1335.5	0.637561	1.17	-0.450105		1954.2	719.4	0.36813	1.95	-0.999319
2180	1555.3	0.71344	0.81	-0.337656		1733.5	570.8	0.329276	2.04	-1.11086
2193.5	881.1	0.401687	2.18	-0.912083		1723	597.2	0.346605	2.13	-1.05957
2236.5	1020.4	0.456249	1.89	-0.784717		1698.3	450.1	0.26503	2.56	-1.32791
						1422	348.8	0.245288	2.4	-1.40532
						1877.8	360.8	0.19214	3.06	-1.64953

## Sheet: SEU15
3 WAP						5 WAP						10 WAP
Above PAR	Below PAR	I/Io	LAI	ln(I/Io)		Above PAR	Below PAR	I/Io	LAI	ln(I/Io)		Above PAR	Below PAR	I/Io	LAI	ln(I/Io)
1383	647.2	0.467968	1.11	-0.759355		2124.2	808.8	0.380755	2.07	-0.965599		2003.5	524.2	0.261642	2.76	-1.34078
1394.2	586.2	0.420456	1.3	-0.866415		2076.3	854	0.411309	1.83	-0.888412		2219	589.8	0.265795	2.98	-1.32503
1358.3	638.6	0.470147	1.14	-0.754711		2199.8	517.1	0.235067	2.64	-1.44789		741.3	211.3	0.28504	1.54	-1.25513
1335	480.3	0.359775	1.47	-1.02228		1631.2	499.6	0.306278	2.11	-1.18326		1090.9	356.2	0.326519	1.62	-1.11927
1325.4	506.9	0.382451	1.38	-0.961156		2100.6	826.8	0.393602	1.99	-0.932415		1937.1	778.2	0.401735	1.86	-0.911964
1559.8	889.1	0.570009	0.97	-0.562103		1774.2	480	0.270544	2.37	-1.30732		1833	533.6	0.291107	2.25	-1.23406
1467.8	945.1	0.643889	0.69	-0.440229		1646.6	424.9	0.258047	2.47	-1.35461		2413.5	792.3	0.328278	2.19	-1.11389
1374.5	699.5	0.508912	1.03	-0.67548		1685.4	332	0.196986	2.86	-1.62462		2155.5	487.7	0.226258	2.75	-1.48608
1434.5	823.3	0.573928	0.9	-0.555251		1654.5	252.8	0.152795	3.12	-1.87866
1405.4	516.7	0.367653	1.51	-1.00061		1535.9	440.4	0.286737	2.41	-1.24919
2043.5	1098.8	0.537705	1.59	-0.620445		1990.8	442.5	0.222272	2.82	-1.50385
2033.3	870.5	0.428122	2.01	-0.848348		1929.1	501.9	0.260173	2.57	-1.34641
2022.8	920	0.454815	1.95	-0.787864		1905.1	565.1	0.296625	2.38	-1.21529
1976.9	1316.7	0.666043	0.93	-0.406401		1905.6	439.2	0.230479	2.66	-1.4676
2029.9	1408.3	0.693778	0.83	-0.365603		1975.4	500	0.253113	2.7	-1.37392
2082.2	1139.9	0.54745	1.48	-0.602484		1996.3	1201.3	0.601763	1.14	-0.507891
2109.7	1116.9	0.529412	1.62	-0.635989		2029.4	590.9	0.29117	2.6	-1.23385
2056	1038.5	0.505107	1.64	-0.682985		1958.4	550.5	0.281097	2.57	-1.26906
						1791.8	454.2	0.253488	2.49	-1.37244
						1950.3	548.5	0.281239	2.38	-1.26855

## Sheet: SEU16
3 WAP						5 WAP						10 WAP
Above PAR	Below PAR	I/Io	LAI	ln(I/Io)		Above PAR	Below PAR	I/Io	LAI	ln(I/Io)		Above PAR	Below PAR	I/Io	LAI	ln(I/Io)
1731.2	879.5	0.508029	1.16	-0.677217		2004.8	1052.1	0.524791	1.54	-0.644756		1963.1	432.6	0.220366	3.18	-1.51247
1809	937.1	0.518021	1.17	-0.657739		2114	1128.8	0.533964	1.37	-0.627427		2151.6	729.1	0.338864	2.58	-1.08216
1809.7	1077.7	0.595513	0.91	-0.518332		2175.2	977.4	0.449338	1.73	-0.79998		2347.3	643.8	0.274273	2.92	-1.29363
1787.5	1014.2	0.567385	0.98	-0.566718		2199.2	843.2	0.383412	1.99	-0.958645		2346.6	564	0.240348	2.99	-1.42567
1787.5	982.2	0.549483	1.05	-0.598778		2161.4	919.1	0.425234	1.79	-0.855117		2132.1	653.7	0.306599	2.49	-1.18221
1733.2	975.2	0.562659	0.96	-0.575082		1982.7	1153.9	0.581984	1.37	-0.541312		2172.3	673.6	0.310086	2.58	-1.17091
1721.1	996.7	0.579106	0.9	-0.546269		2004.8	1052.1	0.524791	1.54	-0.644756		2171.5	1002.3	0.46157	1.65	-0.773121
1722.1	1048	0.608559	0.83	-0.496661		2038.8	574.3	0.281685	2.45	-1.26696		1809.8	619.9	0.342524	2.01	-1.07141
1703	1170.5	0.687317	0.64	-0.37496
1682.5	1050.5	0.624368	0.82	-0.471015		2114.6	1007.3	0.476355	1.59	-0.741592
2069.7	1223.5	0.591148	1.27	-0.525688		1929.3	561.3	0.290935	2.47	-1.23466
2048.5	1290.6	0.630022	1.01	-0.462001		1773.4	438.7	0.247378	2.7	-1.39684
2068.6	1051.9	0.508508	1.67	-0.676274		1795.5	523.4	0.291507	2.37	-1.23269
2060.8	1191.8	0.578319	1.21	-0.547629		1788.3	723.1	0.404351	1.85	-0.905473
2058.2	1391.7	0.676173	0.96	-0.391306		1756.4	453.2	0.258028	2.52	-1.35469
2078.3	1030.7	0.495934	1.68	-0.701312		1870.3	540	0.288724	2.22	-1.24228
2119.2	1016.7	0.479757	1.85	-0.734477		1905.8	857.1	0.449732	1.73	-0.799103
2050.4	979.4	0.477663	1.93	-0.73885		1921.3	584.9	0.304429	2.19	-1.18932
						1941.2	683.5	0.352102	2.04	-1.04383
						1890.9	853.9	0.451584	1.48	-0.794994

## Sheet: SEU17
3 WAP						5 WAP						10 WAP
Above PAR	Below PAR	I/Io	LAI	ln(I/Io)		Above PAR	Below PAR	I/Io	LAI	ln(I/Io)		Above PAR	Below PAR	I/Io	LAI	ln(I/Io)
1803.8	1165.5	0.646136	0.75	-0.436745		1843.1	538.3	0.292062	2.31	-1.23079		2142.1	784.6	0.366276	2.49	-1.00437
1777.1	1060.3	0.596646	0.87	-0.516431		2028.5	863.1	0.425487	1.71	-0.854521		2065.4	792	0.383461	3.3	-0.958518
1656.7	923.1	0.557192	0.95	-0.584845		2162	1054.8	0.487882	1.48	-0.717683		560.3	286.9	0.512047	1.26	-0.669339
1536	921.8	0.60013	0.81	-0.510609		1912.1	509.1	0.266252	2.58	-1.32331		536.7	285.9	0.5327	1.3	-0.629797
1489.7	763.6	0.512586	1.07	-0.668286		2141	1155	0.539468	1.25	-0.617173		1957.4	792.3	0.404772	2.84	-0.904432
1617.1	932.6	0.576711	0.97	-0.550413		1894.5	588.7	0.310742	2.18	-1.16879		2125.8	775.8	0.364945	2.72	-1.00801
1596.7	706.3	0.44235	1.43	-0.815654		1926.9	627.5	0.325653	2.18	-1.12192		2169.2	557.9	0.257192	2.26	-1.35793
1570.9	671.8	0.427653	1.45	-0.849443		1937.5	598.6	0.308955	2.43	-1.17456		2271.9	789.6	0.347551	2.62	-1.05685
1534.7	737.7	0.48068	1.2	-0.732553		1943	472.3	0.243078	2.49	-1.41437
1549.3	668.7	0.431614	1.36	-0.840223		1911.6	506.6	0.265014	2.39	-1.32797
2078.9	760.8	0.365963	2.51	-1.00522		1843.1	538.3	0.292062	2.31	-1.23079
2067.2	762.9	0.36905	2.7	-0.996823		1934.1	313.1	0.161884	3.18	-1.82087
2075.6	698	0.336288	2.67	-1.08979		1916.9	456.2	0.237988	2.69	-1.43553
2069.1	812.3	0.392586	2.33	-0.934999		1912.1	509.1	0.266252	2.58	-1.32331
2075.4	936	0.450997	1.86	-0.796294		1886.8	495.9	0.262826	2.58	-1.33626
2051.5	1470.2	0.716646	0.82	-0.333173		2002.8	661.7	0.330387	2.17	-1.10749
2078.7	1229.5	0.591475	1.37	-0.525135		1963.1	461.6	0.235138	2.72	-1.44758
2070.2	1247.5	0.602599	1.24	-0.506504		1588.3	503.7	0.317132	1.99	-1.14844
2068.4	1209.1	0.584558	1.35	-0.536899		1956.5	310.8	0.158855	3.42	-1.83976
2065.8	1444.5	0.699245	0.95	-0.357754		1930.8	644.9	0.334007	2.14	-1.09659

## Sheet: Pacific-999
3 WAP						5 WAP						10 WAP
Above PAR	Below PAR	I/Io	LAI	ln(I/Io)		Above PAR	Below PAR	I/Io	LAI	ln(I/Io)		Above PAR	Below PAR	I/Io	LAI	ln(I/Io)
1432.9	1019.3	0.711355	0.51	-0.340584		1792.5	673.4	0.375676	1.81	-0.979027		2142.1	784.6	0.366276	2.63	-1.00437
1410.1	1108.2	0.785902	0.36	-0.240924		1874.4	506.8	0.27038	2.6	-1.30793		2065.4	792	0.383461	2.47	-0.958518
1418.8	1098.1	0.773964	0.39	-0.25623		1804.7	488.3	0.270571	2.46	-1.30722		560.3	286.9	0.512047	0.8	-0.669339
1383.9	1000.2	0.72274	0.48	-0.324706		1754.5	256.5	0.146195	3.21	-1.92281		536.7	285.9	0.5327	0.75	-0.629797
1378.3	1006.6	0.73032	0.47	-0.314273		2197.6	1298.5	0.590872	1.11	-0.526156		1957.4	792.3	0.404772	1.78	-0.904432
1512.6	815.1	0.538873	1.05	-0.618274		1792.5	673.4	0.375676	1.81	-0.979027		2125.8	775.8	0.364945	1.93	-1.00801
1565.4	874.9	0.558899	0.97	-0.581787		1980.8	480.8	0.24273	2.61	-1.4158		2169.2	557.9	0.257192	2.73	-1.35793
1537.6	1118.4	0.727367	0.54	-0.318324		1874.4	506.8	0.27038	2.6	-1.30793		2271.9	789.6	0.347551	2.22	-1.05685
1579.7	1152	0.729252	0.5	-0.315735		1754.5	256.5	0.146195	3.21	-1.92281
1619.1	826.9	0.510716	1.11	-0.671942		1804.7	488.3	0.270571	2.46	-1.30722
1984.4	1423.6	0.717396	0.84	-0.332128		1869.7	596.2	0.318875	2.18	-1.14296
1993.2	1193.3	0.598686	1.35	-0.513019		1912.3	481.8	0.251948	2.51	-1.37853
1998.9	851.4	0.425934	2.06	-0.85347		1860	732.6	0.393871	1.78	-0.931732
1978.2	1251.9	0.632848	1.15	-0.457525		1865.3	733.5	0.393234	1.78	-0.93335
1977.7	1124.5	0.56859	1.4	-0.564596		1840.3	668.1	0.363039	1.93	-1.01325
2134	1443	0.676195	0.84	-0.391274		1950.8	647.5	0.331915	2.13	-1.10288
2125.9	1564.7	0.736018	0.75	-0.306501		1914.6	362.2	0.189178	3.08	-1.66507
2077.9	1479.1	0.711824	0.81	-0.339924		1894	399.6	0.210982	2.94	-1.55598
						1905.4	301	0.157972	3.36	-1.84534
						1897.6	421.2	0.221965	2.94	-1.50524

## Sheet: Bhadra
3 WAP						5 WAP						5 WAP
Above PAR	Below PAR	I/Io	LAI	ln(I/Io)		Above PAR	Below PAR	I/Io	LAI	ln(I/Io)		Above PAR	Below PAR	I/Io	LAI	ln(I/Io)
1330.5	827.4	0.621871	0.68	-0.475022		2195.9	834.7	0.380117	1.99	-0.967275		2087.6	745.3	0.357013	2.36	-1.02998
1577.5	844.1	0.535087	0.99	-0.625326		2083.5	728.7	0.349748	2.33	-1.05054		1999.3	601.4	0.300805	2.86	-1.20129
1685.7	761.8	0.451919	1.33	-0.794252		2178.5	908.3	0.416938	2.11	-0.874817		2500.1	1290.9	0.516339	1.58	-0.660991
1652.2	666.3	0.40328	1.49	-0.908123		2121	1178.3	0.55554	1.27	-0.587815		1704	735	0.431338	1.52	-0.840863
1677	778.2	0.464043	1.26	-0.767778		2130.3	981	0.460499	1.61	-0.775446		1914.2	784.8	0.409989	1.71	-0.891626
1522.7	792.8	0.520654	1.06	-0.652669		1818.9	360.8	0.198362	2.9	-1.61766		2264	713.5	0.31515	2.32	-1.15471
1507.2	702.4	0.46603	1.17	-0.763506		1752.5	340.6	0.194351	2.84	-1.63809		2294.5	542.5	0.236435	2.71	-1.44208
1508.7	801	0.530921	0.96	-0.633143		1859.3	447.1	0.240467	2.52	-1.42517		2308.8	862.7	0.373657	2.11	-0.984416
1545.9	847.4	0.54816	0.95	-0.601189		1858.3	634.9	0.341656	2.03	-1.07395
1531.6	1069.1	0.698028	0.57	-0.359496		1831.4	619.1	0.338047	1.96	-1.08457
1938.3	1542.2	0.795646	0.47	-0.228601		1943.3	545.6	0.28076	2.55	-1.27026
1938.4	1290.5	0.665755	0.79	-0.406833		1789.9	728.7	0.407118	1.9	-0.898653
1933.9	1080.6	0.558767	1.36	-0.582022		1691.2	615.1	0.363706	2.15	-1.01141
1923.1	1119.9	0.582341	1.32	-0.540699		1789.4	596.5	0.333352	2.14	-1.09856
2071.5	869.8	0.419889	2.16	-0.867765		1737.6	516.4	0.297192	2.2	-1.21338
2130.6	1119.4	0.525392	1.63	-0.643611		1711.6	682.1	0.398516	1.87	-0.920008
2125.3	1062.6	0.499976	1.8	-0.693194		1941.1	437.2	0.225233	2.73	-1.49062
2130.2	993.3	0.466294	1.77	-0.762938		1728.8	688	0.397964	1.83	-0.921394
						2010.5	875.4	0.435414	1.66	-0.831458
						2008	1069.2	0.53247	1.25	-0.630228

[truncated: 3 more sheets: Extinction Coefficienct, Leaf Fractional Interception, Sheet2]
