# Supplementary material for: Will future maize improvement programs leverage the canopy light-interception, photosynthetic, and biomass capacities of traditional accessions?
Source: PeerJ. 2023 Apr 27;11:e15233. doi: 10.7717/peerj.15233 (PMC10149054; doi:10.7717/peerj.15233)
Supplement: Supplemental Information 7 [file peerj-11-15233-s007.xlsx]

## Sheet: Sheet1
No	Block	Treatment	Replicate	3WAP_QY_Light	3WAP_QY_Dark	6WAP_QY_Light	6WAP_QY_Dark	10 WAP_QY_Light	10 WAP_QY_Dark
1	1	4	1	0.69	0.72	0.43	0.49	0.56	0.68
2	1	4	2	0.67	0.76	0.51	0.71	0.64	0.49
3	1	4	3	0.67	0.76	0.47	0.69	0.66	0.7
4	1	4	4	0.69	0.77	0.59	0.62	0.53	0.71
5	1	4	5	0.72	0.76	0.46	0.69	0.65	0.75
6	1	10	1	0.71	0.78	0.57	0.75	0.55	0.73
7	1	10	2	0.73	0.74	0.68	0.76	0.64	0.71
8	1	10	3	0.68	0.69	0.67	0.67	0.21	0.44
9	1	10	4	0.7	0.68	0.62	0.76	0.32	0.65
10	1	10	5	0.69	0.77	0.52	0.65	0.63	0.63
11	1	7	1	0.66	0.73	0.53	0.62	0.57	0.58
12	1	7	2	0.67	0.73	0.58	0.71	0.69	0.74
13	1	7	3	0.73	0.76	0.68	0.78	0.69	0.66
14	1	7	4	0.62	0.76	0.58	0.71	0.47	0.71
15	1	7	5	0.67	0.74	0.6	0.72	0.66	0.69
16	1	8	1	0.69	0.74	0.65	0.44	0.59	0.68
17	1	8	2	0.67	0.74	0.57	0.75	0.66	0.62
18	1	8	3	0.71	0.74	0.5	0.74	0.4	0.66
19	1	8	4	0.65	0.78	0.44	0.75	0.25	0.73
20	1	8	5	0.69	0.73	0.61	0.75	0.61	0.64
21	1	9	1	0.68	0.71	0.62	0.58	0.68	0.68
22	1	9	2	0.66	0.78	0.55	0.73	0.52	0.76
23	1	9	3	0.7	0.8	0.7	0.77	0.62	0.69
24	1	9	4	0.66	0.74	0.57	0.75	0.59	0.65
25	1	9	5	0.65	0.77	0.67	0.64	0.67	0.67
26	1	1	1	0.64	0.76	0.44	0.71	0.68	0.69
27	1	1	2	0.7	0.75	0.63	0.61	0.57	0.66
28	1	1	3	0.67	0.76	0.61	0.75	0.64	0.68
29	1	1	4	0.7	0.71	0.57	0.72	0.65	0.62
30	1	1	5	0.69	0.76	0.59	0.77	0.63	0.61
31	1	3	1	0.66	0.71	0.68	0.66	0.58	0.76
32	1	3	2	0.64	0.69	0.48	0.74	0.58	0.7
33	1	3	3	0.69	0.65	0.72	0.69	0.67	0.68
34	1	3	4	0.65	0.75	0.56	0.79	0.65	0.68
35	1	3	5	0.65	0.74	0.61	0.76	0.63	0.65
36	1	6	1	0.7	0.72	0.63	0.76	0.35	0.68
37	1	6	2	0.72	0.75	0.58	0.7	0.58	0.66
38	1	6	3	0.69	0.73	0.65	0.65	0.66	0.79
39	1	6	4	0.71	0.79	0.59	0.75	0.51	0.7
40	1	6	5	0.69	0.73	0.52	0.71	0.6	0.7
41	1	2	1	0.69	0.72	0.53	0.74	0.62	0.67
42	1	2	2	0.65	0.7	0.65	0.77	0.65	0.67
43	1	2	3	0.69	0.7	0.58	0.73	0.61	0.68
44	1	2	4	0.69	0.78	0.55	0.75	0.7	0.73
45	1	2	5	0.73	0.73	0.5	0.72	0.66	0.69
46	1	5	1	0.7	0.7	0.55	0.76	0.54	0.67
47	1	5	2	0.64	0.73	0.59	0.78	0.58	0.73
48	1	5	3	0.64	0.7	0.54	0.76	0.26	0.69
49	1	5	4	0.61	0.71	0.7	0.7	0.6	0.55
50	1	5	5	0.63	0.66	0.62	0.79	0.56	0.7
51	2	7	1	0.6	0.78	0.48	0.67	0.63	0.64
52	2	7	2	0.64	0.74	0.54	0.72	0.64	0.75
53	2	7	3	0.64	0.71	0.59	0.8	0.62	0.63
54	2	7	4	0.66	0.67	0.66	0.71	0.7	0.74
55	2	7	5	0.62	0.77	0.6	0.72	0.69	0.72
56	2	4	1	0.63	0.74	0.68	0.68	0.68	0.67
57	2	4	2	0.64	0.74	0.65	0.74	0.61	0.71
58	2	4	3	0.67	0.73	0.64	0.62	0.18	0.67
59	2	4	4	0.67	0.71	0.68	0.75	0.67	0.7
60	2	4	5	0.65	0.72	0.66	0.85	0.53	0.67
61	2	1	1	0.63	0.76	0.57	0.68	0.62	0.76
62	2	1	2	0.68	0.69	0.73	0.76	0.52	0.76
63	2	1	3	0.71	0.75	0.65	0.75	0.65	0.77
64	2	1	4	0.71	0.75	0.72	0.72	0.55	0.74
65	2	1	5	0.66	0.7	0.54	0.71	0.57	0.76
66	2	2	1	0.66	0.78	0.7	0.79	0.55	0.73
67	2	2	2	0.69	0.68	0.56	0.79	0.59	0.73
68	2	2	3	0.68	0.67	0.52	0.67	0.41	0.7
69	2	2	4	0.71	0.78	0.54	0.72	0.66	0.75
70	2	2	5	0.59	0.68	0.59	0.71	0.6	0.76
71	2	10	1	0.62	0.69	0.46	0.71	0.64	0.63
72	2	10	2	0.68	0.71	0.6	0.69	0.68	0.73
73	2	10	3	0.71	0.78	0.65	0.69	0.63	0.68
74	2	10	4	0.7	0.68	0.65	0.54	0.59	0.69
75	2	10	5	0.66	0.74	0.6	0.66	0.59	0.7
76	2	5	1	0.67	0.71	0.74	0.73	0.65	0.76
77	2	5	2	0.69	0.69	0.64	0.65	0.63	0.62
78	2	5	3	0.65	0.58	0.58	0.73	0.66	0.64
79	2	5	4	0.58	0.77	0.53	0.73	0.59	0.66
80	2	5	5	0.63	0.76	0.59	0.74	0.63	0.75
81	2	6	1	0.62	0.78	0.47	0.78	0.62	0.73
82	2	6	2	0.67	0.78	0.63	0.78	0.71	0.69
83	2	6	3	0.68	0.78	0.69	0.67	0.68	0.57
84	2	6	4	0.64	0.74	0.63	0.71	0.62	0.77
85	2	6	5	0.65	0.77	0.66	0.72	0.7	0.73
86	2	3	1	0.65	0.72	0.54	0.7	0.67	0.7
87	2	3	2	0.71	0.73	0.62	0.74	0.66	0.7
88	2	3	3	0.68	0.8	0.7	0.75	0.62	0.76
89	2	3	4	0.71	0.68	0.62	0.75	0.62	0.73
90	2	3	5	0.66	0.73	0.53	0.69	0.65	0.72
91	2	9	1	0.65	0.72	0.51	0.78	0.66	0.73
92	2	9	2	0.7	0.76	0.6	0.66	0.7	0.74
93	2	9	3	0.64	0.73	0.59	0.76	0.65	0.7
94	2	9	4	0.6	0.76	0.6	0.78	0.61	0.7
95	2	9	5	0.6	0.65	0.67	0.72	0.59	0.77
96	2	8	1	0.59	0.73	0.59	0.67	0.56	0.69
97	2	8	2	0.7	0.68	0.7	0.71	0.6	0.65
98	2	8	3	0.7	0.74	0.7	0.7	0.57	0.57
99	2	8	4	0.69	0.73	0.71	0.68	0.63	0.76
100	2	8	5	0.55	0.64	0.43	0.69	0.71	0.62
101	3	1	1	0.64	0.78	0.7	0.72	0.65	0.76
102	3	1	2	0.69	0.69	0.73	0.69	0.57	0.75
103	3	1	3	0.6	0.78	0.72	0.71	0.63	0.81
104	3	1	4	0.65	0.71	0.67	0.72	0.64	0.68
105	3	1	5	0.65	0.75	0.7	0.76	0.66	0.65
106	3	9	1	0.58	0.72	0.69	0.76	0.58	0.71
107	3	9	2	0.67	0.77	0.67	0.71	0.63	0.66
108	3	9	3	0.64	0.69	0.69	0.62	0.59	0.77
109	3	9	4	0.68	0.77	0.71	0.75	0.47	0.79
110	3	9	5	0.57	0.68	0.73	0.76	0.48	0.77
111	3	8	1	0.64	0.77	0.67	0.74	0.57	0.66
112	3	8	2	0.57	0.68	0.68	0.68	0.7	0.66
113	3	8	3	0.68	0.72	0.52	0.77	0.66	0.74
114	3	8	4	0.67	0.75	0.69	0.52	0.67	0.75
115	3	8	5	0.63		0.72	0.73	0.57	0.5
116	3	7	1	0.67	0.72	0.69	0.74	0.46	0.76
117	3	7	2	0.7	0.74	0.7	0.72	0.53	0.72
118	3	7	3	0.65	0.7	0.71	0.73	0.65	0.71
119	3	7	4	0.66	0.7	0.65	0.74	0.58	0.78
120	3	7	5	0.67	0.73	0.36	0.64	0.62	0.74
121	3	3	1	0.65	0.8	0.64	0.76	0.69	0.77
122	3	3	2	0.71	0.76	0.61	0.77	0.49	0.77
123	3	3	3	0.65	0.75	0.63	0.64	0.5	0.75
124	3	3	4	0.65	0.67	0.47	0.74	0.45	0.74
125	3	3	5	0.63	0.74	0.58	0.69	0.6	0.76
126	3	5	1	0.67	0.75	0.48	0.36	0.49	0.74
127	3	5	2	0.63	0.69	0.71	0.7	0.65	0.75
128	3	5	3	0.63	0.78	0.6	0.67	0.63	0.67
129	3	5	4	0.66	0.69	0.5	0.75	0.5	0.61
130	3	5	5	0.61	0.75	0.64	0.67	0.6	0.74
131	3	4	1	0.51	0.74	0.64	0.7	0.67	0.77
132	3	4	2	0.66	0.68	0.58	0.7	0.62	0.66
133	3	4	3	0.61	0.8	0.42	0.67	0.64	0.64
134	3	4	4	0.54	0.79	0.26	0.73	0.63	0.69
135	3	4	5	0.63	0.76	0.3	0.67	0.65	0.65
136	3	10	1	0.54	0.63	0.53	0.69	0.68	0.78
137	3	10	2	0.65	0.77	0.59	0.76	0.66	0.7
138	3	10	3	0.68	0.77	0.57	0.62	0.58	0.79
139	3	10	4	0.7	0.8	0.34	0.73	0.54	0.73
140	3	10	5	0.71	0.78	0.68	0.72	0.69	0.72
141	3	6	1	0.62	0.74	0.69	0.64	0.54	0.72
142	3	6	2	0.64	0.73	0.62	0.71	0.64	0.69
143	3	6	3	0.62	0.7	0.55	0.69	0.64	0.73
144	3	6	4	0.64	0.7	0.49	0.75	0.61	0.73
145	3	6	5	0.66	0.77	0.55	0.77	0.72	0.66
146	3	2	1	0.53	0.73	0.47	0.68	0.62	0.73
147	3	2	2	0.68	0.71	0.61	0.72	0.66	0.74
148	3	2	3	0.66	0.75	0.44	0.71	0.54	0.72
149	3	2	4	0.67	0.79	0.63	0.76	0.63	0.76
150	3	2	5	0.7	0.77	0.47	0.76	0.71	0.7
151	4	2	1	0.68	0.67	0.56	0.73	0.69	0.76
152	4	2	2	0.62	0.73	0.66	0.73	0.6	0.72
153	4	2	3	0.67	0.74	0.64	0.74	0.61	0.69
154	4	2	4	0.63	0.69	0.65	0.52	0.57	0.668
155	4	2	5	0.68	0.7	0.39	0.76	0.63	0.71
156	4	3	1	0.6	0.66	0.46	0.72	0.54	0.69
157	4	3	2	0.63	0.71	0.61	0.71	0.64	0.73
158	4	3	3	0.6	0.72	0.54	0.75	0.49	0.66
159	4	3	4	0.63	0.72	0.65	0.75	0.51	0.73
160	4	3	5	0.65	0.74	0.45	0.75	0.7	0.71
161	4	9	1	0.64	0.71	0.56	0.75	0.48	0.69
162	4	9	2	0.69	0.72	0.52	0.78	0.67	0.75
163	4	9	3	0.7	0.72	0.58	0.69	0.52	0.8
164	4	9	4	0.65	0.71	0.7	0.78	0.65	0.73
165	4	9	5	0.66	0.72	0.56	0.76	0.67	0.72
166	4	4	1	0.61	0.68	0.7	0.73	0.6	0.76
167	4	4	2	0.65	0.66	0.46	0.64	0.64	0.69
168	4	4	3	0.62	0.74	0.56	0.75	0.68	0.67
169	4	4	4	0.65	0.53	0.53	0.72	0.69	0.72
170	4	4	5	0.49	0.64	0.58	0.52	0.65	0.66
171	4	10	1	0.67	0.72	0.55	0.73	0.56	0.66
172	4	10	2	0.62	0.68	0.68	0.65	0.68	0.71
173	4	10	3	0.62	0.68	0.56	0.62	0.61	0.66
174	4	10	4	0.6	0.72	0.51	0.74	0.57	0.66
175	4	10	5	0.66	0.73	0.42	0.73	0.52	0.72
176	4	6	1	0.55	0.67	0.61	0.74	0.6	0.72
177	4	6	2	0.55	0.72	0.58	0.75	0.7	0.72
178	4	6	3	0.63	0.73	0.63	0.58	0.7	0.66
179	4	6	4	0.59	0.75	0.62	0.68	0.64	0.72
180	4	6	5	0.62	0.75	0.69	0.67	0.59	0.66
181	4	1	1	0.54	0.72	0.61	0.52	0.67	0.75
182	4	1	2	0.68	0.77	0.7	0.73	0.64	0.7
183	4	1	3	0.66	0.74	0.64	0.71	0.61	0.76
184	4	1	4	0.61	0.79	0.58	0.8	0.45	0.78
185	4	1	5	0.56	0.77	0.52	0.76	0.56	0.72
186	4	8	1	0.62	0.74	0.65	0.72	0.66	0.68
187	4	8	2	0.57	0.77	0.69	0.51	0.57	0.64
188	4	8	3	0.64	0.76	0.46	0.72	0.63	0.68
189	4	8	4	0.58	0.73	0.54	0.74	0.61	0.65
190	4	8	5	0.64		0.68	0.7	0.7	0.65
191	4	7	1	0.55	0.7	0.49	0.75	0.47	0.62
192	4	7	2	0.64	0.74	0.53	0.75	0.64	0.79
193	4	7	3	0.65	0.76	0.51	0.74	0.57	0.75
194	4	7	4	0.65	0.73	0.19	0.52	0.71	0.62
195	4	7	5	0.65	0.76	0.62	0.73	0.45	0.64
196	4	5	1	0.63	0.72	0.58	0.72	0.49	0.71
197	4	5	2	0.59	0.74	0.57	0.68	0.64	0.5
198	4	5	3	0.62	0.7	0.59	0.76	0.45	0.67
199	4	5	4	0.59	0.73	0.54	0.75	0.58	0.7
200	4	5	5	0.64	0.76	0.47	0.71	0.62	0.63
