# Supplementary material for: Will future maize improvement programs leverage the canopy light-interception, photosynthetic, and biomass capacities of traditional accessions?
Source: PeerJ. 2023 Apr 27;11:e15233. doi: 10.7717/peerj.15233 (PMC10149054; doi:10.7717/peerj.15233)
Supplement: Supplemental Information 8 [file peerj-11-15233-s008.xlsx]

## Sheet: Sheet1
No	Block	Treatment	Transpration_Rate_molm-2s-1	Photosysnthetic_Rate_µmolm-2S-1	Intercellular_CO2_Concentration_µmolmol-1	Stomatal_Conductance_molm-2S-1
1	1	4	0.00366378	25.8534	100.814	0.211002
2	1	4	0.00462073	31.8093	88.6614	0.27611
3	1	4	0.00272977	21.7142	58.3583	0.136004
4	1	4	0.004332	32.0105	69.5217	0.252129
5	1	4	0.00262228	20.3043	78.2969	0.134855
6	1	10	0.0031624	27.6845	66.5646	0.221601
7	1	10	0.00455395	29.5512	119.228	0.346311
8	1	10	0.00221966	18.1285	138.976	0.166508
9	1	10	0.00556133	33.9334	114.416	0.452938
10	1	10	0.00575292	31.8489	155.185	0.573509
11	1	7	0.0064501	38.0975	120.249	0.543153
12	1	7	0.00445836	28.0623	139.737	0.328128
13	1	7	0.00305983	26.8926	87.0071	0.218752
14	1	7	0.00283138	25.6842	98.9935	0.215645
15	1	7	0.00339078	28.2653	103.384	0.259286
16	1	9	0.00474268	34.4436	92.4611	0.350839
17	1	9	0.00483111	34.5608	99.5455	0.369942
18	1	9	0.00316872	25.8046	117.221	0.241343
19	1	9	0.00343742	27.677	94.7409	0.239457
20	1	9	0.00357917	29.7709	82.6523	0.253227
21	1	1	0.00411249	31.2143	116.77	0.312485
22	1	1	0.00242894	23.6001	77.8652	0.163955
23	1	1	0.00448618	31.996	118.804	0.332242
24	1	1	0.00388554	29.1903	118.935	0.282312
25	1	1	0.00418474	32.9003	105.359	0.31959
26	1	3	0.0046023	31.5982	135.913	0.364221
27	1	3	0.00366222	30.1979	103.199	0.271607
28	1	3	0.00226635	21.1632	105.077	0.159209
29	1	3	0.00287285	23.4227	135.547	0.216994
30	1	3	0.00379335	29.2277	107.919	0.265089
31	1	6	0.00348329	25.314	59.4676	0.186859
32	1	6	0.00329917	22.9291	104.477	0.200005
33	1	6	0.00154424	12.8025	80.878	0.0796389
34	1	6	0.00264731	19.387	82.8208	0.139458
35	1	6	0.00305629	21.6796	80.2615	0.162443
36	1	2	0.00271311	21.3571	56.8459	0.142783
37	1	2	0.00280611	21.0908	67.0115	0.146781
38	1	2	0.00220461	17.7702	64.5086	0.114046
39	1	2	0.00264695	20.1381	67.4271	0.13755
40	1	2	0.00253817	19.0011	80.0893	0.133872
41	1	5	0.00191533	15.5234	75.7191	0.0997565
42	1	5	0.00285018	21.9878	51.2496	0.145583
43	1	5	0.00228651	17.3982	104.178	0.131779
44	1	5	0.00304757	17.501	127.654	0.151583
45	1	5	0.00371102	26.3856	68.4649	0.208334
46	1	8	0.0047075	32.2626	127.986	0.441948
47	1	8	0.00421346	29.7043	111.059	0.326392
48	1	8	0.00497209	34.278	116.33	0.462425
49	1	8	0.00361475	29.8722	79.4107	0.269423
50	1	8	0.0029445	24.8871	97.1026	0.21651
51	1	8	0.00409803	32.4935	102.409	0.36618
52	1	8	0.00449761	28.8187	139.955	0.382584
53	2	7	0.002181	21.7293	78.5152	0.152132
54	2	7	0.0055598	33.0795	125.105	0.410471
55	2	7	0.00234481	21.702	94.2006	0.163364
56	2	7	0.0031524	26.8613	93.8464	0.226377
57	2	7	0.0039191	31.2107	97.8492	0.311574
58	2	4	0.00219975	20.9617	81.757	0.149549
59	2	4	0.00243461	21.2224	108.101	0.173036
60	2	4	0.00332495	25.6313	92.9285	0.204722
61	2	4	0.00203361	19.3978	59.3274	0.118863
62	2	4	0.00285983	25.1557	83.8547	0.189623
63	2	1	0.00316319	23.0673	92.7536	0.189341
64	2	1	0.00275892	18.9396	93.4926	0.142003
65	2	1	0.00251258	19.712	70.3156	0.13493
66	2	1	0.00461285	28.823	90.1165	0.274184
67	2	1	0.00201512	15.5883	90.7423	0.106801
68	2	2	0.001906	15.6984	67.6161	0.0980029
69	2	2	0.00240132	19.6024	59.7846	0.127938
70	2	2	0.00227015	19.1063	55.6935	0.12141
71	2	2	0.00236162	19.0718	61.612	0.124152
72	2	2	0.00260349	19.4565	89.9498	0.144671
73	2	10	0.00266457	18.2121	117.303	0.150664
74	2	10	0.00144187	12.1605	68.278	0.0712557
75	2	8	0.0048316	33.1986	116.206	0.42926
76	2	8	0.00294477	25.1567	96.0595	0.219066
77	2	8	0.00355131	27.7764	115.075	0.29282
78	2	8	0.00360418	27.4918	112.477	0.283012
79	2	8	0.00418844	31.8314	104.591	0.35734
80	2	8	0.00490494	33.1961	110.452	0.41076
81	2	8	0.00304591	25.3837	106.615	0.236102
82	2	8	0.00351365	29.7047	90.8958	0.284351
83	2	3	0.0046023	31.5982	135.913	0.364221
84	2	3	0.00366222	30.1979	103.199	0.271607
85	2	3	0.00226635	28.1632	105.077	0.159209
86	2	3	0.00287285	28.4227	135.547	0.216994
87	2	3	0.00379335	29.2277	107.919	0.265089
