# Supplementary material for: Will future maize improvement programs leverage the canopy light-interception, photosynthetic, and biomass capacities of traditional accessions?
Source: PeerJ. 2023 Apr 27;11:e15233. doi: 10.7717/peerj.15233 (PMC10149054; doi:10.7717/peerj.15233)
Supplement: Supplemental Information 9 [file peerj-11-15233-s009.xlsx]

## Sheet: No of Kernels, Cob length
No	Block	Treatment	Replicate	No_Kernels_per_Row	No_Rows_per_Cob	Cob_length_cm
1	1	4	1	33	12	19
2	1	4	2	39	14	20.2
3	1	4	3	28	13	19.9
4	1	10	1	39	16	14.5
5	1	10	2	26	14	15.1
6	1	10	3	24	14	14.4
7	1	7	1	36	14	18.3
8	1	7	2	37	14	18.9
9	1	7	3	25	11	19.3
10	1	8	1	31	13	17.7
11	1	8	2	28	14	18.1
12	1	8	3	28	13	17.3
13	1	9	1	39	12	21.9
14	1	9	2	44	13	21.4
15	1	9	3	40	14	20.8
16	1	1	1	38	12	24.5
17	1	1	2	35	12	24.7
18	1	1	3	36	16	24.9
19	1	3	1	28	13	17.7
20	1	3	2	22	12	19.5
21	1	3	3	22	14	19.3
22	1	6	1	31	16	23.2
23	1	6	2	26	14	21.3
24	1	6	3	32	10	22.6
25	1	2	1	33	16	19.8
26	1	2	2	31	12	19.2
27	1	2	3	36	10	20.2
28	1	5	1	14	12	17.9
29	1	5	2	23	12	19.6
30	1	5	3	38	13	19.3
31	2	7	1	36	12	18.5
32	2	7	2	28	10	19.1
33	2	7	3	34	12	17.8
34	2	4	1	40	11	19.6
35	2	4	2	31	12	19.5
36	2	4	3	31	12	20.4
37	2	1	1	43	10	25.1
38	2	1	2	38	12	24.6
39	2	1	3	34	12	23.6
40	2	2	1	36	11	20.3
41	2	2	2	24	14	19.4
42	2	2	3	28	14	20.2
43	2	10	1	37	14	15.4
44	2	10	2	41	12	15.1
45	2	10	3	28	12	14.4
46	2	5	1	28	12	18.7
47	2	5	2	34	14	17.8
48	2	5	3	23	12	19.2
49	2	6	1	45	14	22.4
50	2	6	2	32	9	21.3
51	2	6	3	26	15	22.8
52	2	3	1	40	12	18.6
53	2	3	2	39	12	19.7
54	2	3	3	29	15	17.8
55	2	9	1	36	13	21.7
56	2	9	2	39	12	20.9
57	2	9	3	38	15	21.8
58	2	8	1	31	14	17.9
59	2	8	2	36	12	17.6
60	2	8	3	31	14	17.8
61	3	1	1	41	13	23.4
62	3	1	2	40	14	24.8
63	3	1	3	40	14	24.7
64	3	9	1	45	14	22.7
65	3	9	2	43	14	21.7
66	3	9	3	36	16	20.6
67	3	8	1	24	12	17.9
68	3	8	2	23	16	17.3
69	3	8	3	28	14	17.6
70	3	7	1	32	19	18.8
71	3	7	2	37	14	19.4
72	3	7	3	36	10	19.6
73	3	3	1	39	12	17.9
74	3	3	2	27	17	19.6
75	3	3	3	35	13	18.8
76	3	5	1	27	12	18.9
77	3	5	2	36	13	19.4
78	3	5	3	24	16	20.3
79	3	4	1	37	12	20.1
80	3	4	2	27	14	19.8
81	3	4	3	19	10	20.7
82	3	10	1	32	14	14.7
83	3	10	2	31	14	15.8
84	3	10	3	27	12	14.8
85	3	6	1	27	17	22.5
86	3	6	2	31	12	21.7
87	3	6	3	22	12	23.5
88	3	2	1	31	13	20.5
89	3	2	2	28	12	21.7
90	3	2	3	28	12	19.7
91	4	2	1	30	14	18.6
92	4	2	2	38	13	20.4
93	4	2	3	32	14	20.7
94	4	3	1	38	14	17.9
95	4	3	2	27	11	19.3
96	4	3	3	21	14	18.4
97	4	9	1	44	14	21.7
98	4	9	2	45	14	21
99	4	9	3	41	14	20.7
100	4	4	1	22	13	20.1
101	4	4	2	38	10	19.8
102	4	4	3	25	12	20.4
103	4	10	1	35	16	14.8
104	4	10	2	35	16	15.2
105	4	10	3	34	17	14.3
106	4	6	1	30	14	23.1
107	4	6	2	37	14	21.4
108	4	6	3	33	14	22.5
109	4	1	1	31	16	23.3
110	4	1	2	40	15	24.8
111	4	1	3	43	12	24.8
112	4	8	1	29	12	17.8
113	4	8	2	23	10	18.2
114	4	8	3	22	10	17.8
115	4	7	1	38	14	18.4
116	4	7	2	21	14	19.3
117	4	7	3	26	12	17.7
118	4	5	1	23	12	19.2
119	4	5	2	31	13	18.8
120	4	5	3	28	14	17.7

## Sheet: No of cobs per Plant
No	Block	Treatment	Replicate	No of_Cobs_Per_Plant
1	1	4	1	2.06667
4	1	10	1	1.34783
7	1	7	1	1.83333
10	1	8	1	1.63636
13	1	9	1	1.5
16	1	1	1	1.08333
19	1	3	1	1.3
22	1	6	1	1.47826
25	1	2	1	1.08333
28	1	5	1	1.25
31	2	7	1	1.57143
34	2	4	1	1.18182
37	2	1	1	1.17391
40	2	2	1	1.85714
43	2	10	1	0.952381
46	2	5	1	1.45
49	2	6	1	1.32
52	2	3	1	1.44444
55	2	9	1	1.25
58	2	8	1	0.88
61	3	1	1	1.63158
64	3	9	1	1.8
67	3	8	1	1.47619
70	3	7	1	1.3
73	3	3	1	1.5
76	3	5	1	1.52941
79	3	4	1	1.5
82	3	10	1	1.34783
85	3	6	1	1.16
88	3	2	1	1
91	4	2	1	1.2
94	4	3	1	1.42105
97	4	9	1	1.4
100	4	4	1	1.27273
103	4	10	1	1.28571
106	4	6	1	1.45
109	4	1	1	1.14286
112	4	8	1	1.75
115	4	7	1	1.53333
118	4	5	1	2
